# Supplementary material for: Synthesis of four regioisomeric Ni( ii ) azacorroles via oxidative ring-expansion of prefunctionalised norcorroles
Source: Royal Society of Chemistry journal article supplement (doi:10.1039/d4qo01415d), 2024-01-01
Supplement: d4qo01415d1.pdf [file d4qo01415d1.pdf]

### **Electronic Supporting Information**

#### **Synthesis of four regioisomeric Ni(II) azacorroles via oxidative ring-expansion of prefunctionalised norcorroles**

Sha Li,<sup>a</sup> Shaowei Zhang,<sup>a</sup> Kohei Ohtake,<sup>b</sup> Hiroshi Shinokubo<sup>\*,b</sup> and Xiaofang Li<sup>\*,a</sup>

<sup>a</sup> Key Laboratory of Theoretical Organic Chemistry and Functional Molecules, Ministry of Education, School of Chemistry and Chemical Engineering, Hunan University of Science and Technology, Xiangtan, Hunan 411201, China

<sup>b</sup> Department of Molecular and Macromolecular Chemistry, Graduate School of Engineering, Research Institute for Quantum and Chemical Innovation, Institutes of Innovation for Future Society, and Integrated Research Consortium on Chemical Science (IRCCS), Nagoya University, Furo-cho, Chikusa-ku, 464-8603 Nagoya, Japan

E-mail: lixiaofang@hnust.edu.cn, hshino@chembio.nagoya-u.ac.jp

## Table of contents

- Figs. S1-S4** NMR spectra of **2**.  
**Figs. S5-S8** NMR spectra of **3**.  
**Figs. S9-S11** NMR spectra of **NC-1**.  
**Figs. S12-S15** NMR spectra of **NC-2**.  
**Figs. S16-S17** NMR spectra of **4**.  
**Figs. S18-S19** NMR spectra of **5**.  
**Figs. S20-S21** NMR spectra of **6**.  
**Figs. S22-S23** NMR spectra of **7**.  
**Figs. S24-S25** NMR spectra of **8**.  
**Figs. S26-S27** NMR spectra of **9**.  
**Figs. S28-S29** NMR spectra of a mixture of **10** and **11**.  
**Fig. S30** HR-MS spectrum of **2**.  
**Fig. S31** HR-MS spectrum of **3**.  
**Fig. S32** HR-MS spectrum of **NC-1**.  
**Fig. S33** HR-MS spectrum of **NC-2**.  
**Fig. S34** HR-MS spectrum of **4**.  
**Fig. S35** HR-MS spectrum of **5**.  
**Fig. S36** HR-MS spectrum of **6**.  
**Fig. S37** HR-MS spectrum of **7**.  
**Fig. S38** HR-MS spectrum of **8**.  
**Fig. S39** HR-MS spectrum of **9**.  
**Fig. S40** HR-MS spectrum of a mixture of **10** and **11**.  
**Fig. S41** UV-vis absorption spectrum of **2**.  
**Fig. S42** UV-vis absorption spectrum of **3**.  
**Fig. S43** UV-vis absorption spectrum of **NC-1**.  
**Fig. S44** UV-vis absorption spectrum of **NC-2**.  
**Fig. S45** UV-vis absorption spectrum of **4**.  
**Fig. S46** UV-vis absorption spectrum of **5**.  
**Fig. S47** UV-vis absorption spectrum of **6**.  
**Fig. S48** UV-vis absorption spectrum of **7**.  
**Fig. S49** UV-vis absorption spectrum of **8**.  
**Fig. S50** UV-vis absorption spectrum of **9**.  
**Fig. S51** Cyclic and differential pulse voltammograms for **2**.  
**Fig. S52** Cyclic and differential pulse voltammograms for **3**.  
**Fig. S53** Cyclic and differential pulse voltammograms for **NC-1**.  
**Fig. S54** Cyclic and differential pulse voltammograms for **NC-2**.  
**Fig. S55** Cyclic and differential pulse voltammograms for **4**.  
**Fig. S56** Cyclic and differential pulse voltammograms for **5**.  
**Fig. S57** Cyclic and differential pulse voltammograms for **6**.  
**Fig. S58** Cyclic and differential pulse voltammograms for **7**.  
**Fig. S59** Cyclic and differential pulse voltammograms for **8**.  
**Fig. S60** Cyclic and differential pulse voltammograms for **9**.  
**Fig. S61** (A) HOMO–1, (B) HOMO, (C) LUMO and (D) LUMO+1 of azacorrole **2** calculated at the B3LYP/6-31G(d)+SDD level.  
**Fig. S62** (A) HOMO–1, (B) HOMO, (C) LUMO and (D) LUMO+1 of azacorrole **3** calculated at the B3LYP/6-31G(d)+SDD level.  
**Fig. S63** (A) HOMO–1, (B) HOMO, (C) LUMO and (D) LUMO+1 of azacorrole **4** calculated at the B3LYP/6-31G(d)+SDD level.  
**Fig. S64** (A) HOMO–1, (B) HOMO, (C) LUMO and (D) LUMO+1 of azacorrole **5** calculated at the B3LYP/6-31G(d)+SDD level.

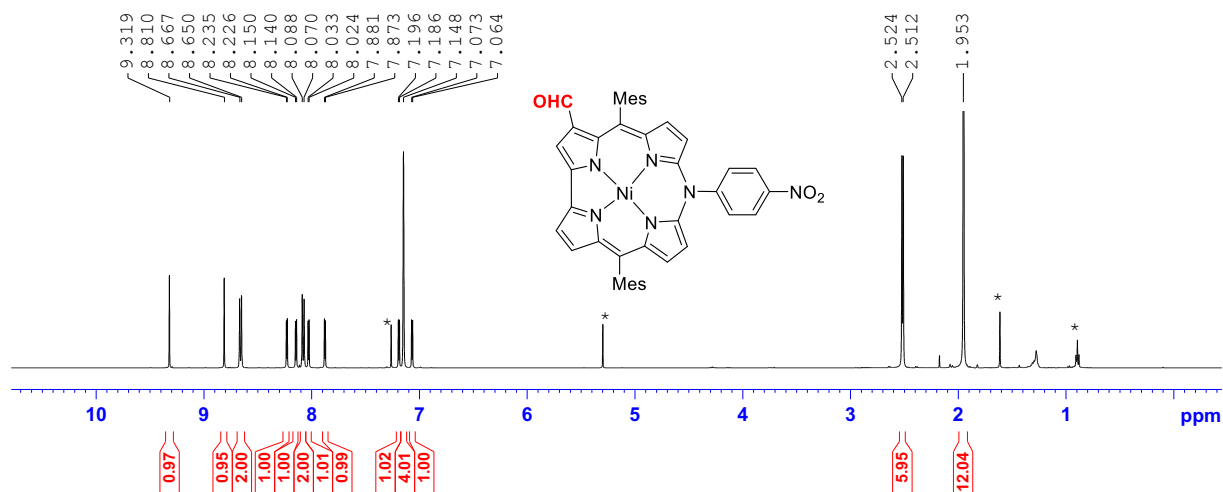

Figure S1.  $^1\text{H}$  NMR spectrum of **2** (500 MHz, 298 K,  $\text{CDCl}_3$ ).

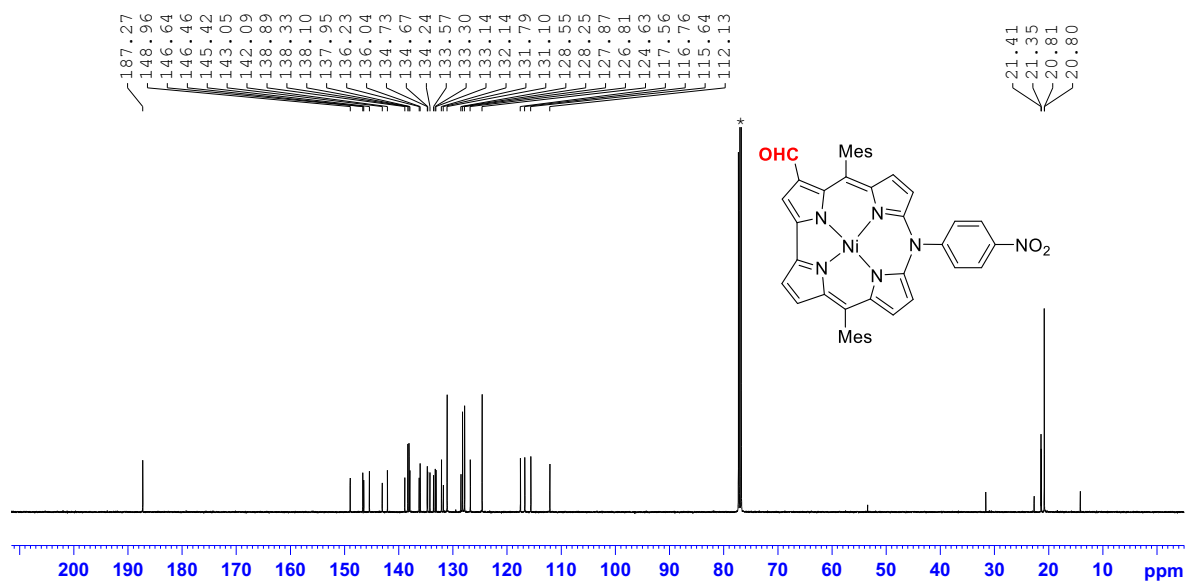

Figure S2.  $^{13}\text{C}$  NMR spectrum of **2** (125 MHz, 298 K,  $\text{CDCl}_3$ ).

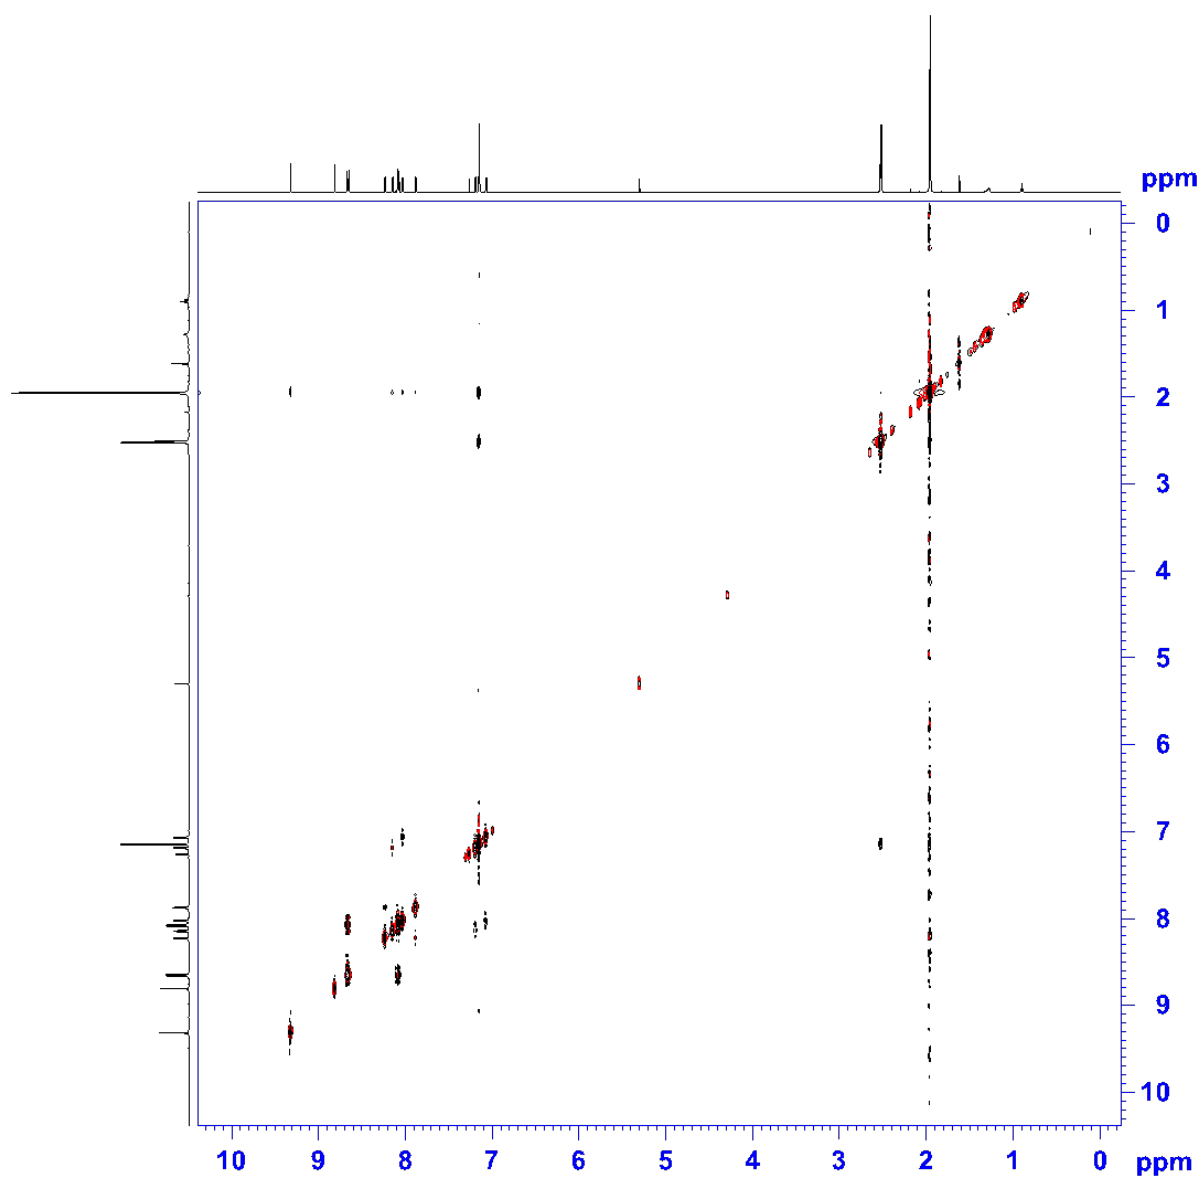

Figure S3.  $^1\text{H}$ - $^1\text{H}$  NOESY spectrum of **2** (500 MHz, 298 K,  $\text{CDCl}_3$ ).

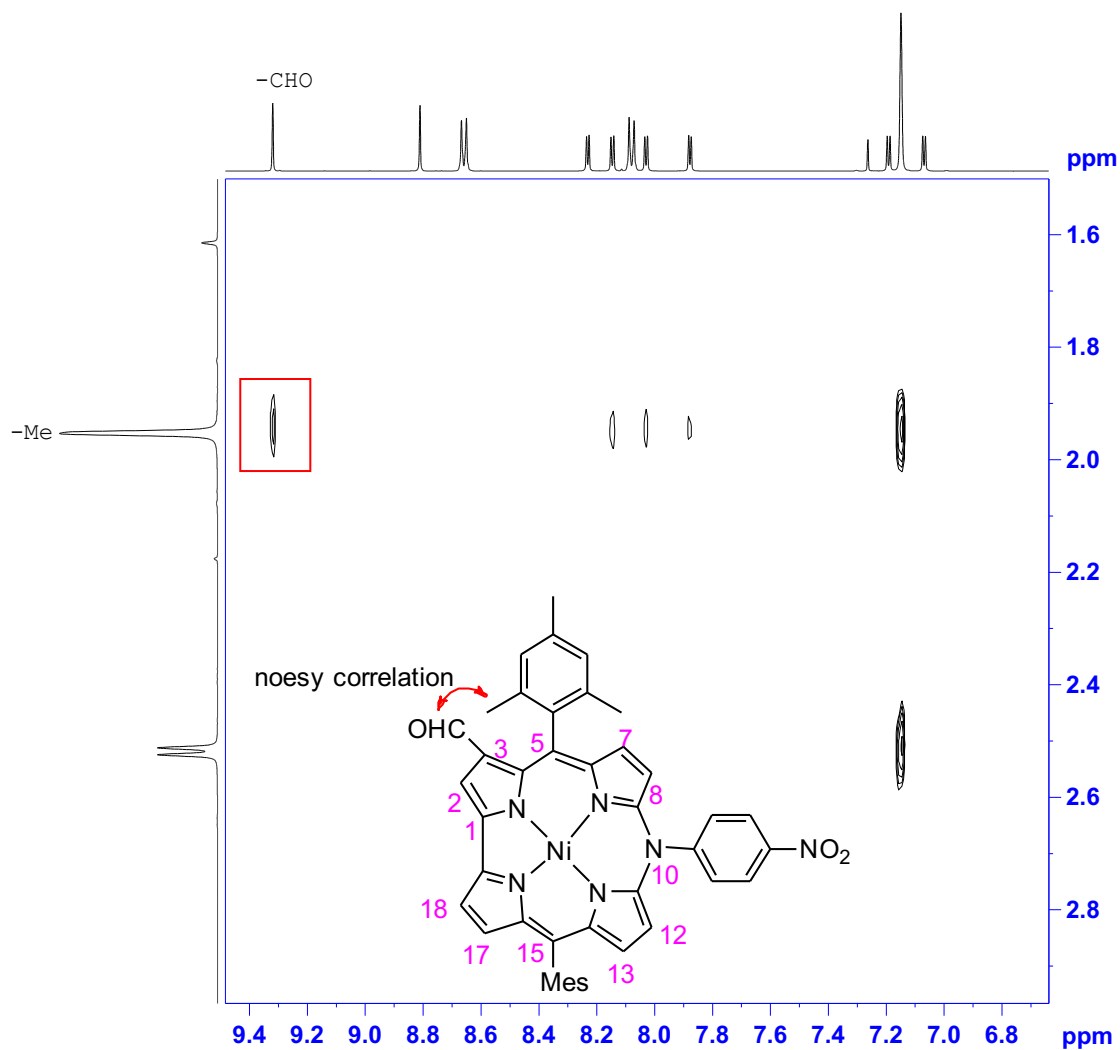

Figure S4. Magnified  $^1\text{H}$ - $^1\text{H}$  NOESY spectrum of **2** (500 MHz, 298 K,  $\text{CDCl}_3$ ).

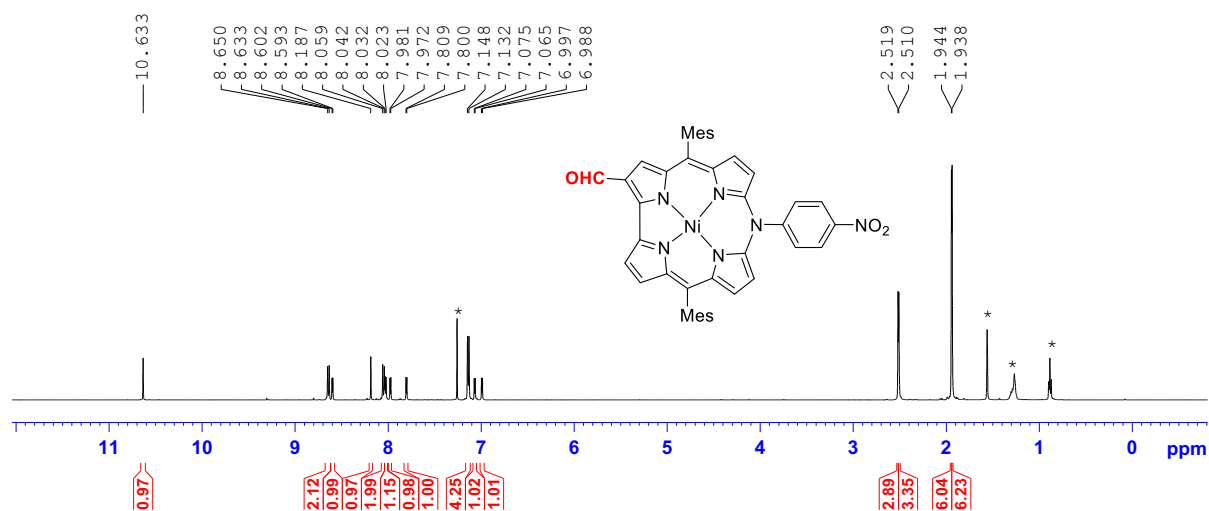

Figure S5.  $^1\text{H}$  NMR spectrum of **3** (500 MHz, 298 K,  $\text{CDCl}_3$ ).

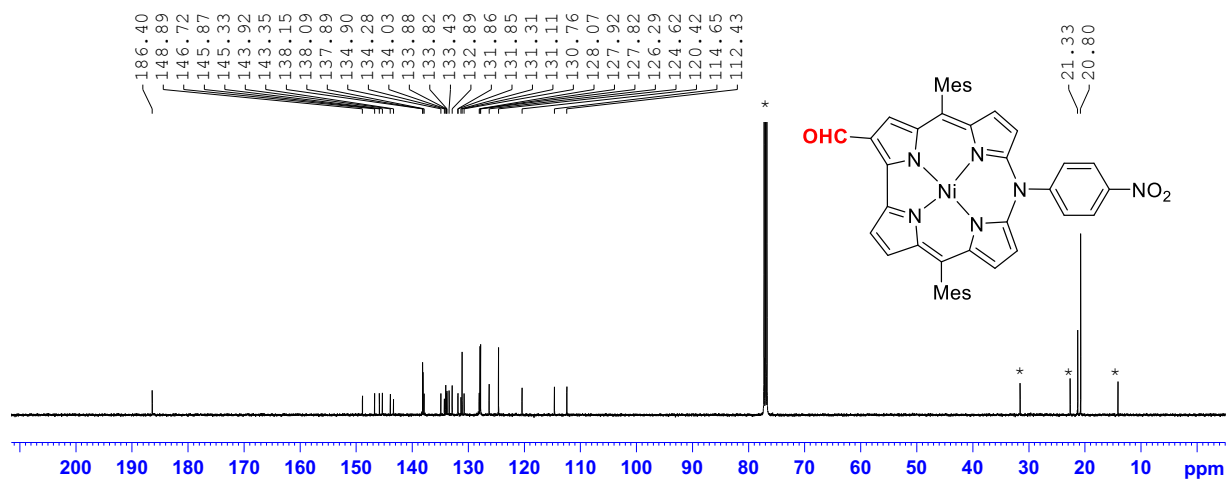

Figure S6.  $^{13}\text{C}$  NMR spectrum of **3** (125 MHz, 298 K,  $\text{CDCl}_3$ ).

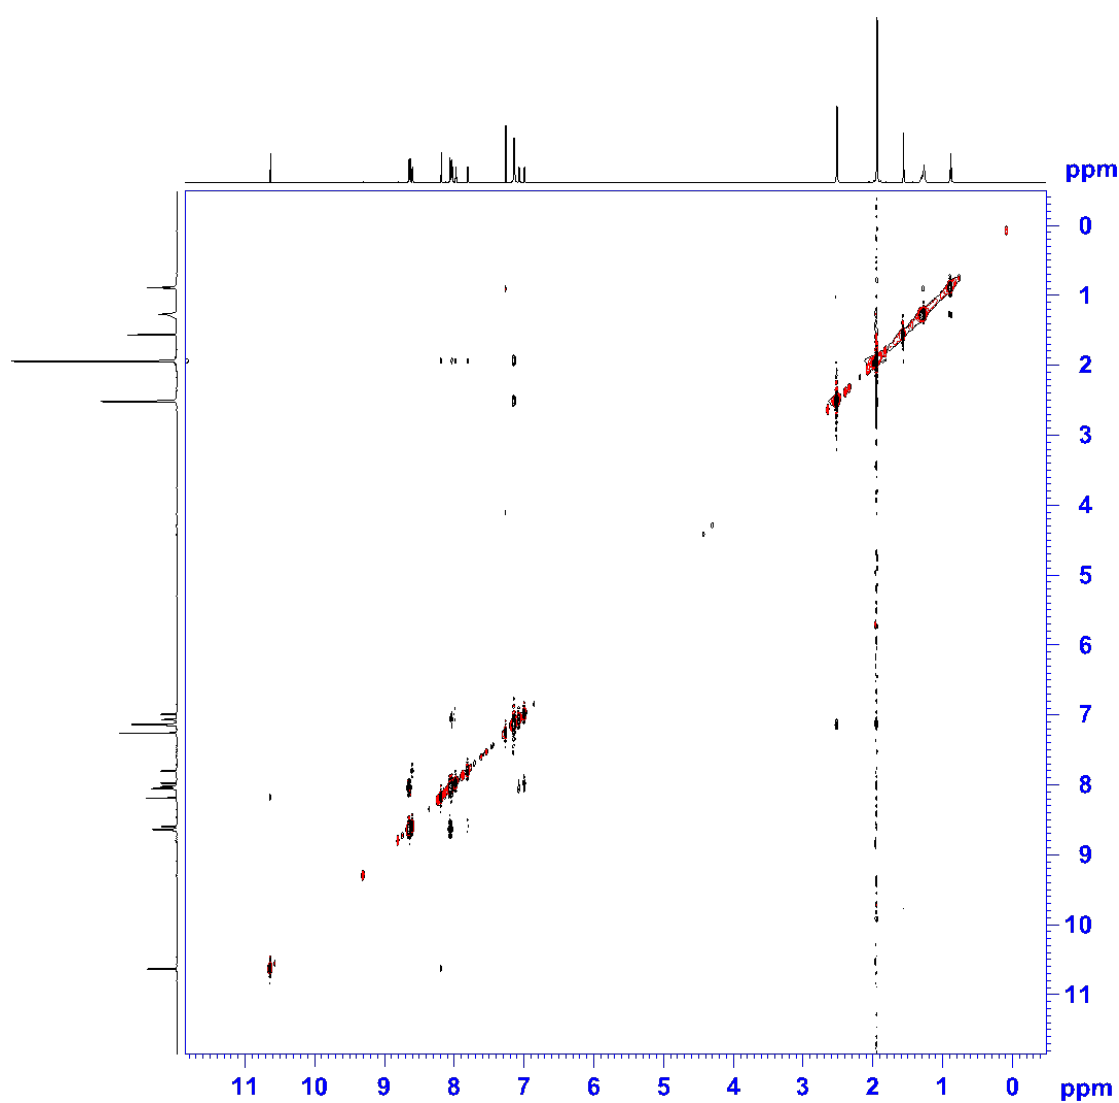

Figure S7.  $^1\text{H}$ - $^1\text{H}$  NOESY spectrum of **3** (500 MHz, 298 K,  $\text{CDCl}_3$ ).

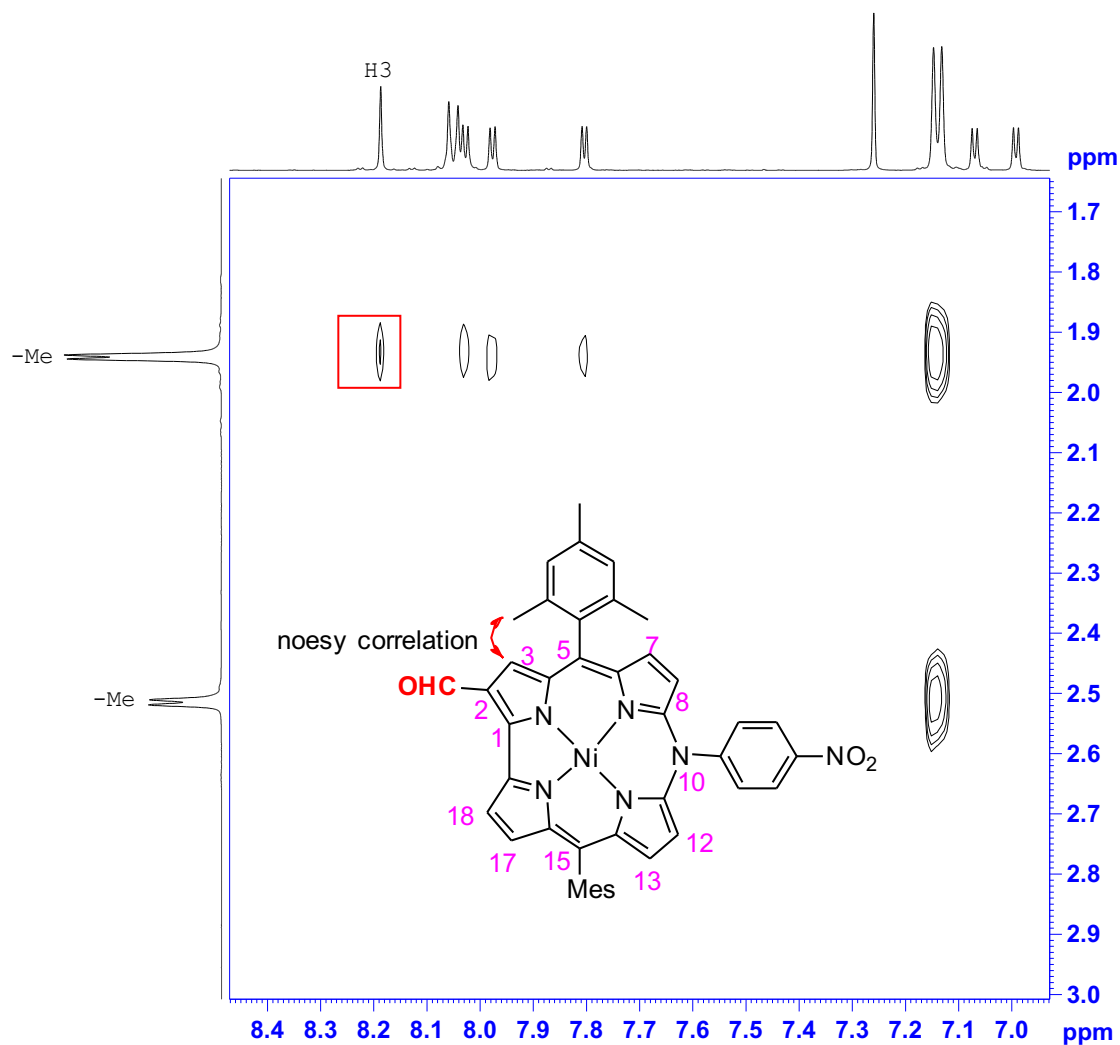

Figure S8. Magnified  $^1\text{H}$ - $^1\text{H}$  NOESY spectrum of **3** (500 MHz, 298 K, CDCl<sub>3</sub>).

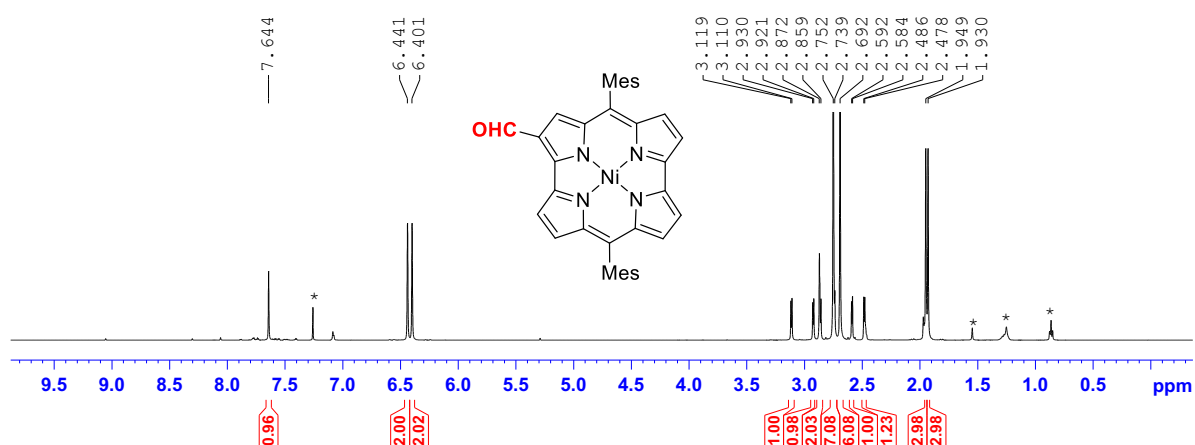

Figure S9.  $^1\text{H}$  NMR spectrum of **NC-1** (500 MHz, 298 K, CDCl<sub>3</sub>).

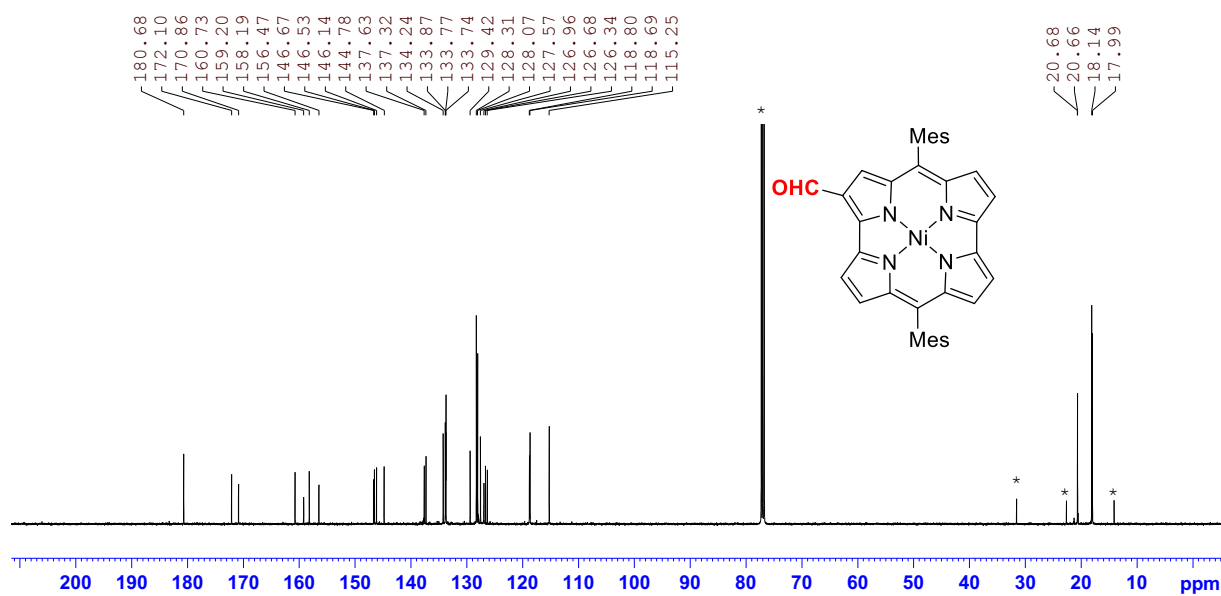

Figure S10. <sup>13</sup>C NMR spectrum of NC-1 (125 MHz, 298 K, CDCl<sub>3</sub>).

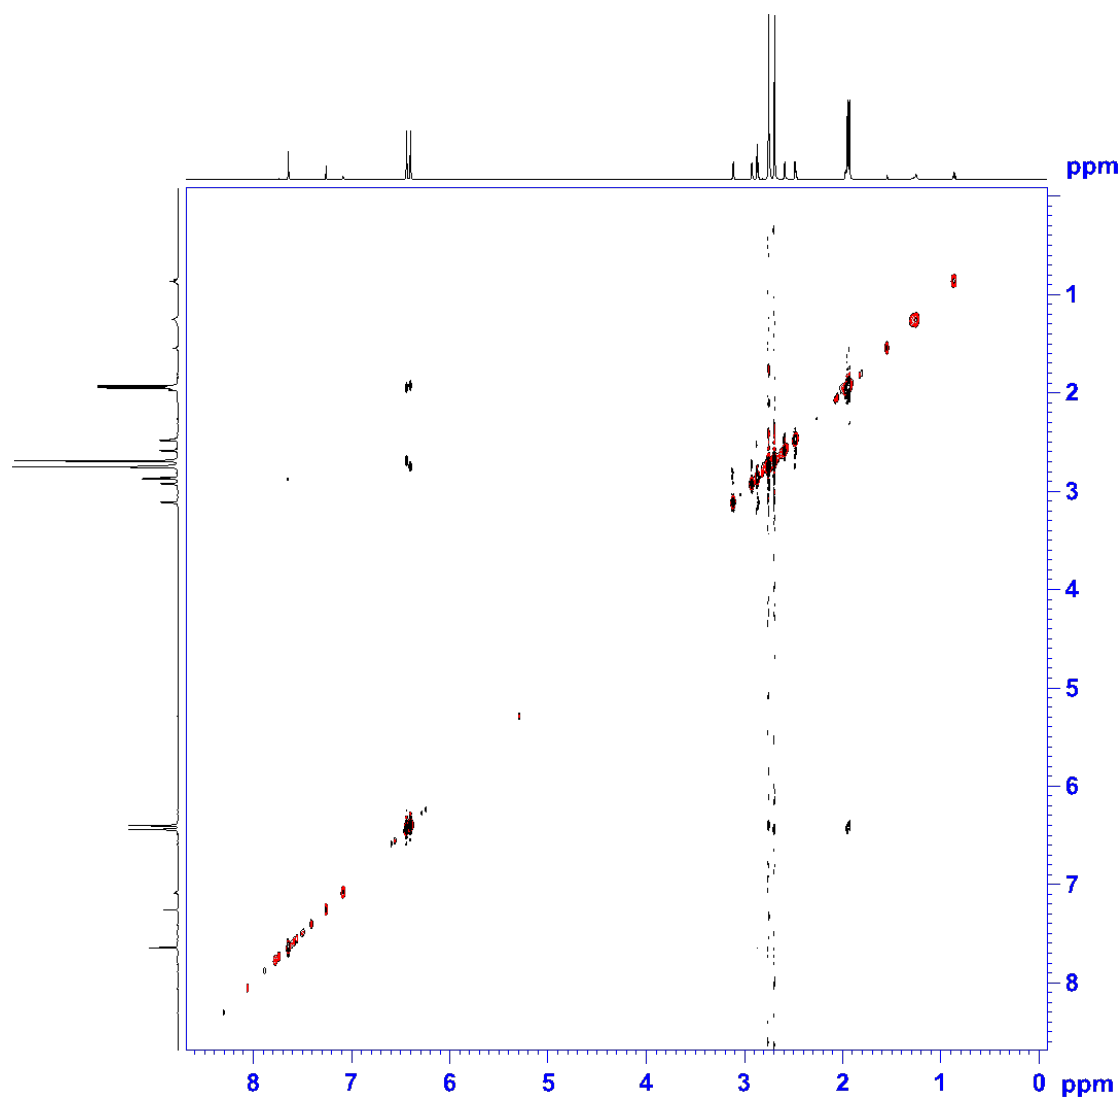

Figure S11. <sup>1</sup>H-<sup>1</sup>H NOESY spectrum of NC-1 (500 MHz, 298 K, CDCl<sub>3</sub>).



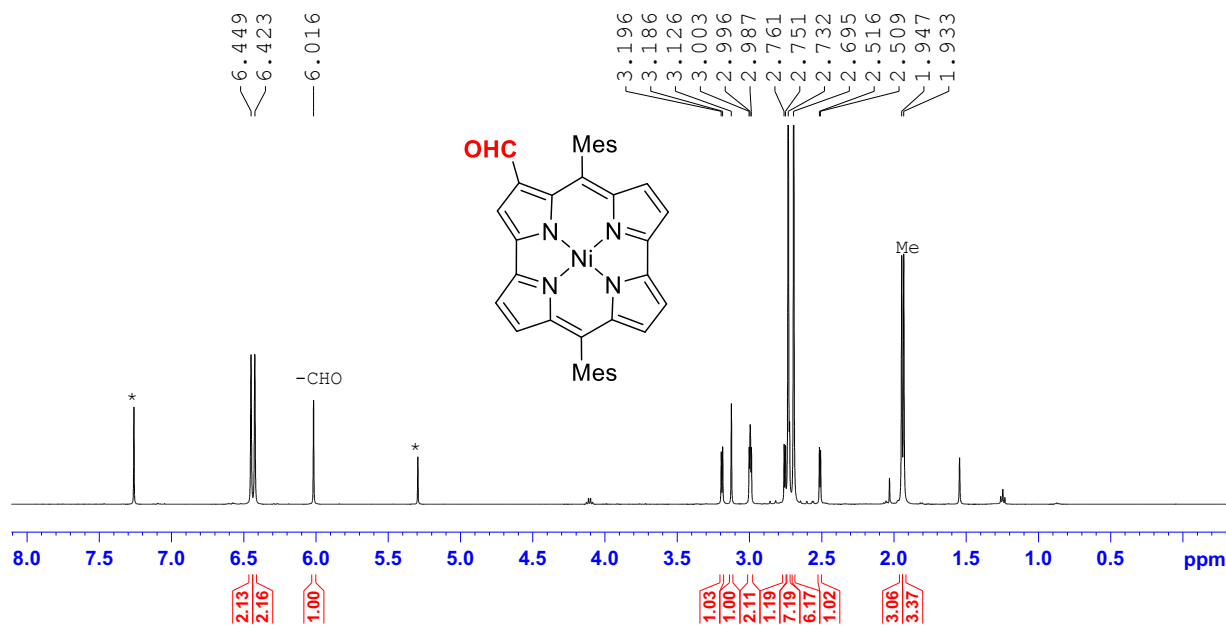

Figure S12. <sup>1</sup>H NMR spectrum of NC-2 (500 MHz, 298 K, CDCl<sub>3</sub>).

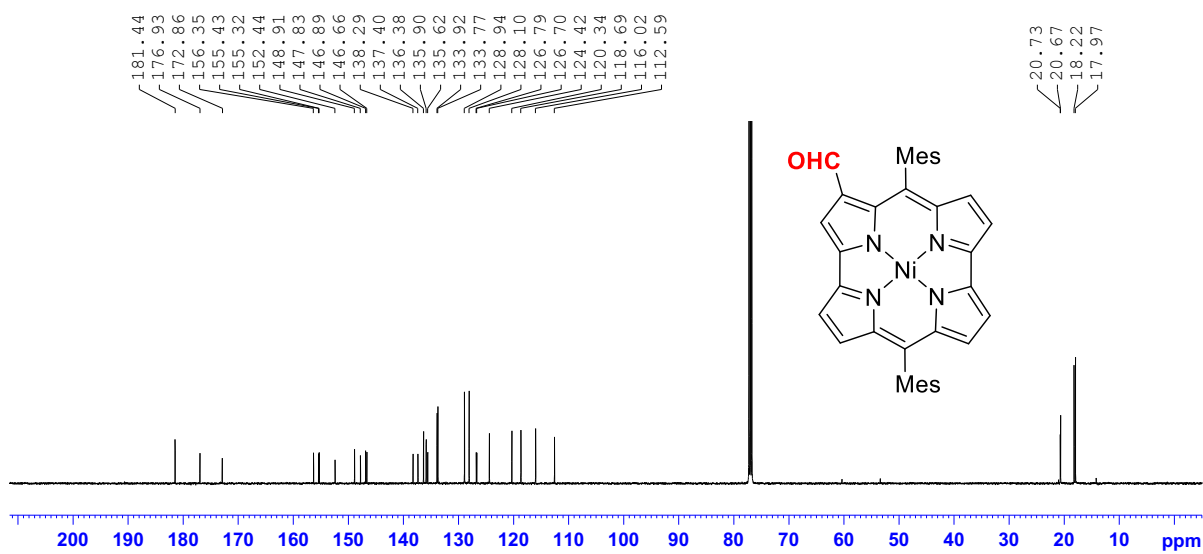

Figure S13. <sup>13</sup>C NMR spectrum of NC-2 (125 MHz, 298 K, CDCl<sub>3</sub>).

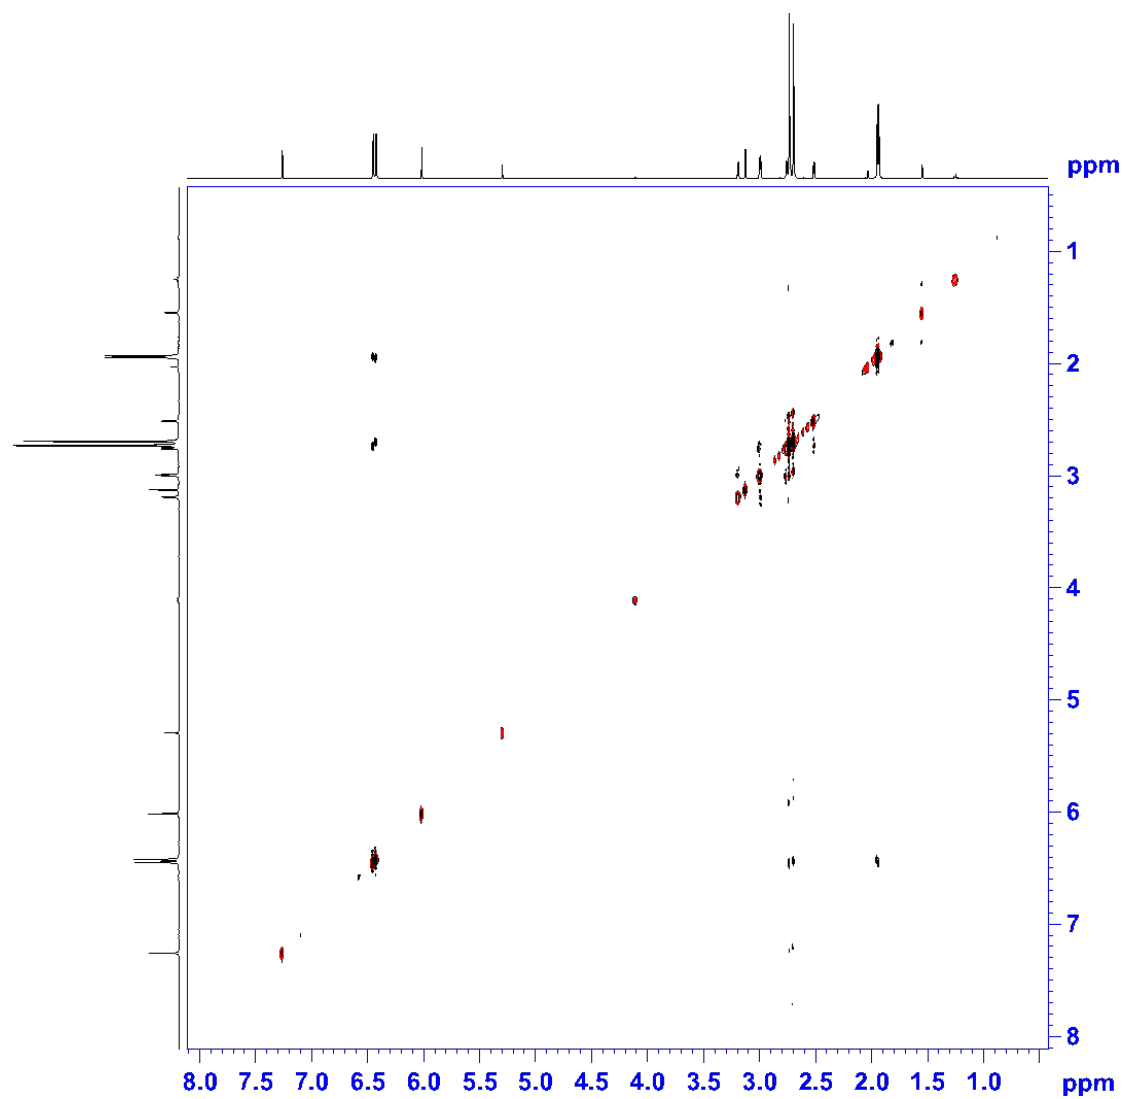

Figure S14.  $^1\text{H}$ - $^1\text{H}$  NOESY spectrum of NC-2 (500 MHz, 298 K,  $\text{CDCl}_3$ ).

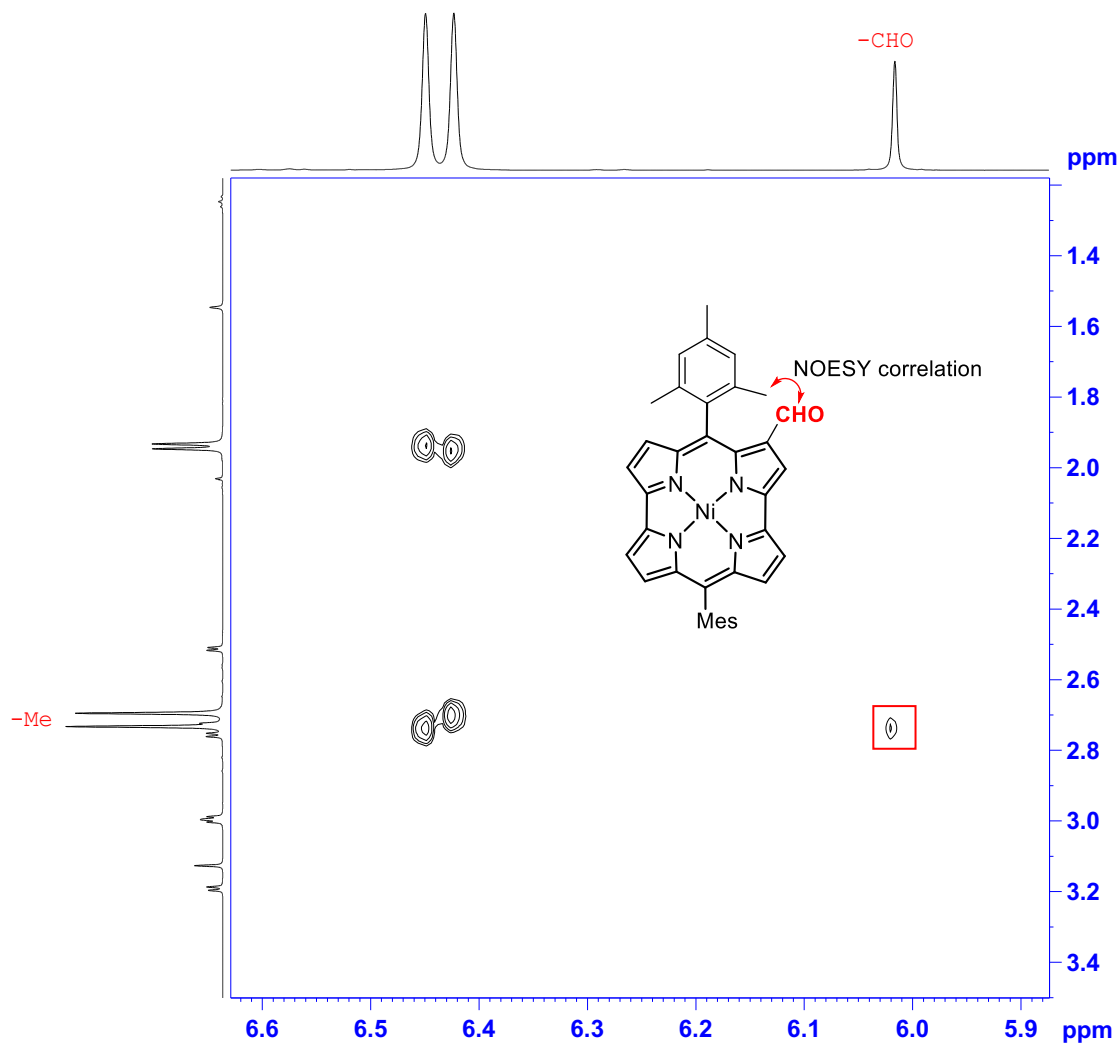

Figure S15. Magnified  $^1\text{H}$ ,  $^1\text{H}$  NOESY spectrum of NC-2 (500 MHz, 298 K,  $\text{CDCl}_3$ ).

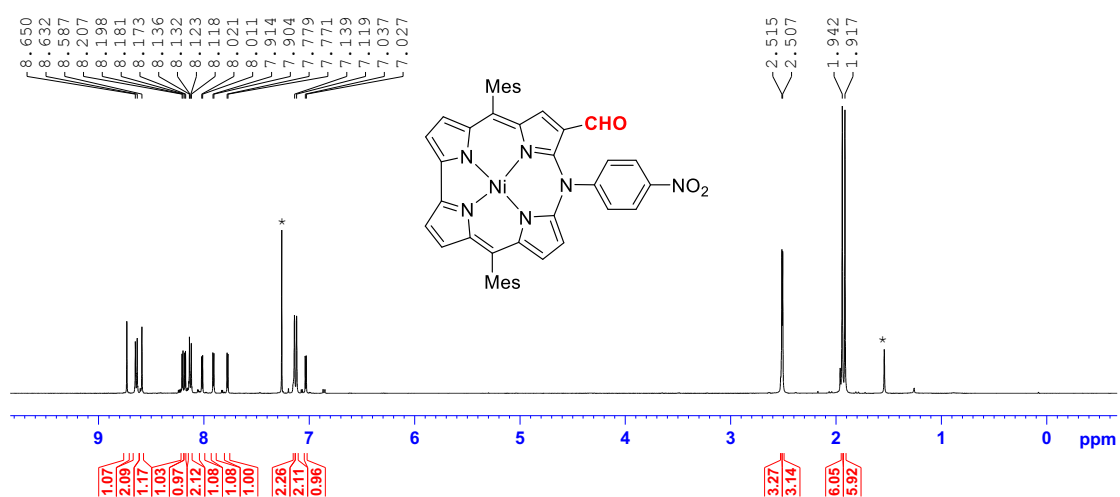

Figure S16.  $^1\text{H}$  NMR spectrum of 4 (500 MHz, 298 K,  $\text{CDCl}_3$ ).

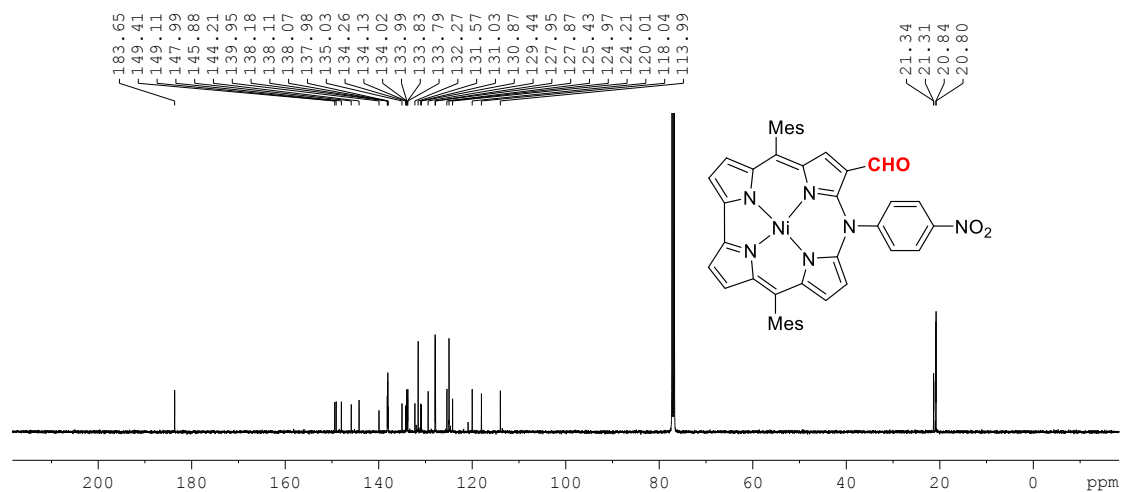

Figure S17.  $^{13}\text{C}$  NMR spectrum of **4** (125 MHz, 298 K,  $\text{CDCl}_3$ ).

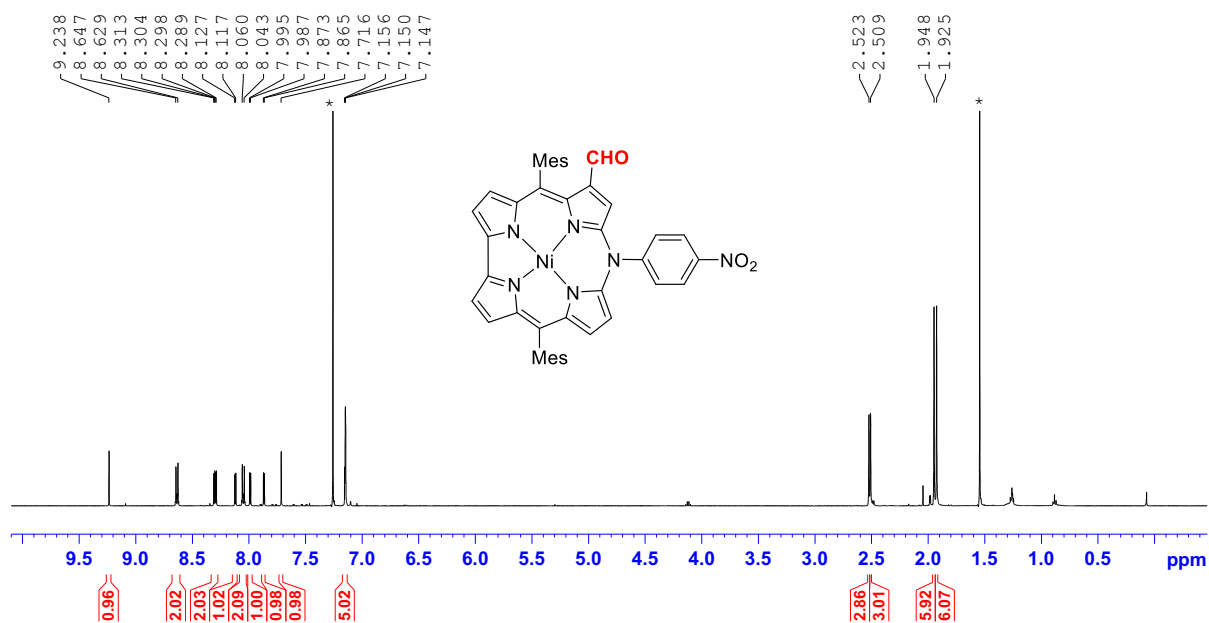

Figure S18.  $^1\text{H}$  NMR spectrum of **5** (500 MHz, 298 K,  $\text{CDCl}_3$ ).

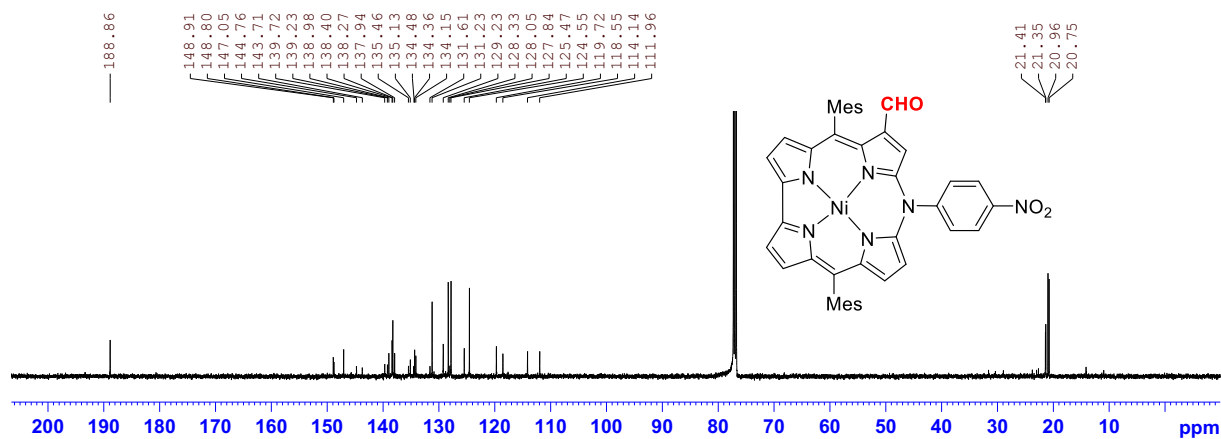

Figure S19.  $^{13}\text{C}$  NMR spectrum of **5** (125 MHz, 298 K,  $\text{CDCl}_3$ ).

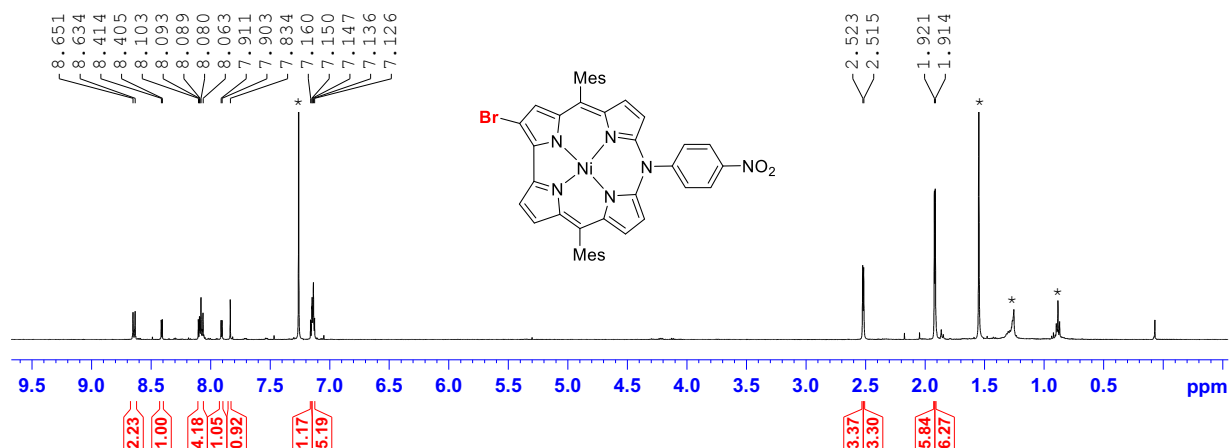

Figure S20.  $^1\text{H}$  NMR spectrum of **6** (500 MHz, 298 K,  $\text{CDCl}_3$ ).

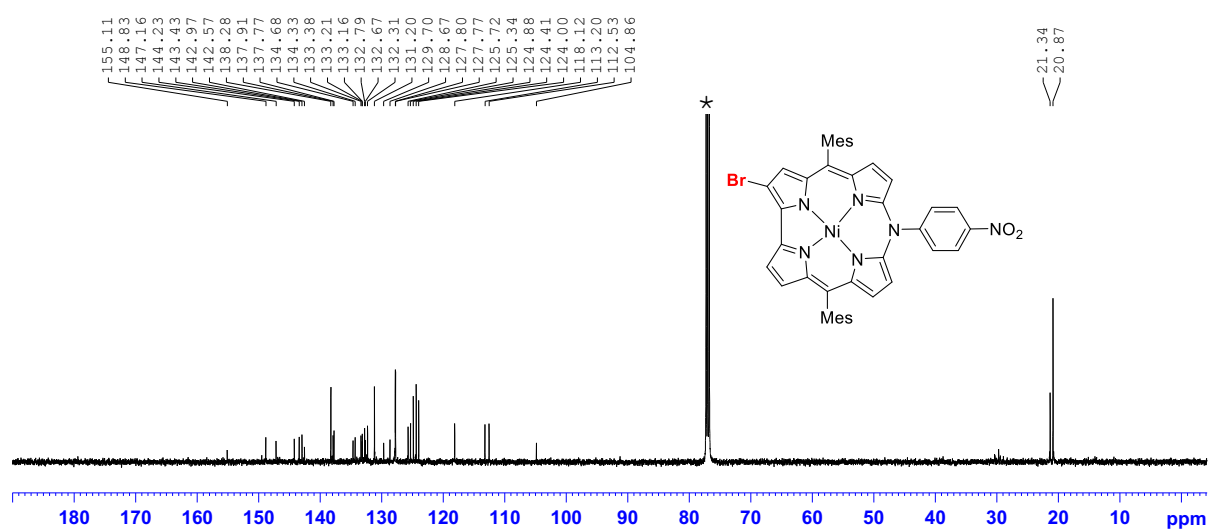

Figure S21.  $^{13}\text{C}$  NMR spectrum of **6** (125 MHz, 298 K,  $\text{CDCl}_3$ ).

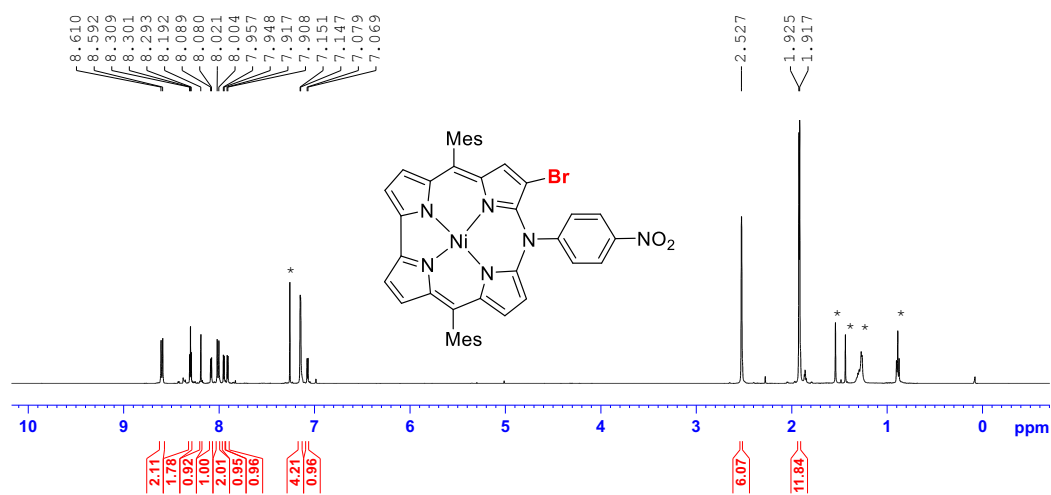

Figure S22.  $^1\text{H}$  NMR spectrum of **7** (500 MHz, 298 K,  $\text{CDCl}_3$ ).

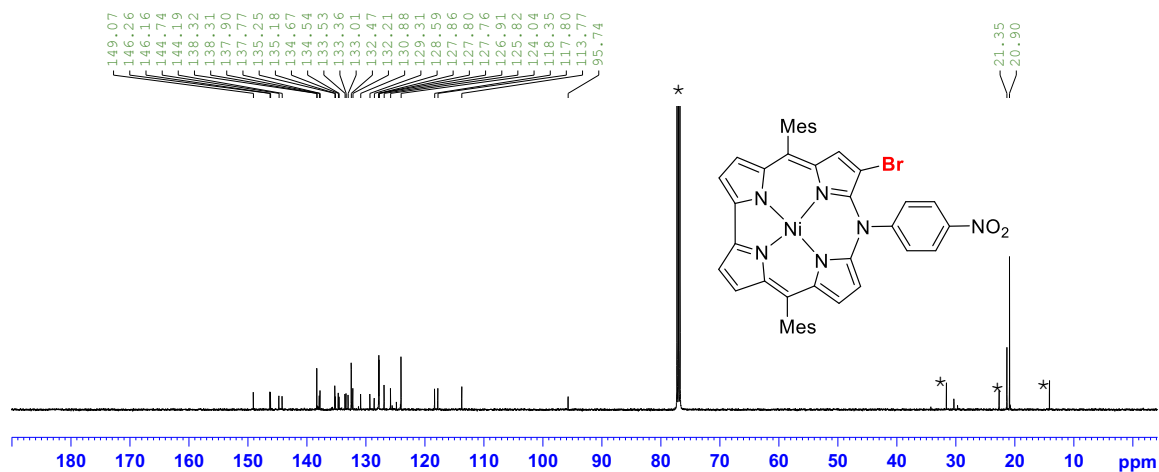

Figure S23. <sup>13</sup>C NMR spectrum of **7** (125 MHz, 298 K, CDCl<sub>3</sub>).

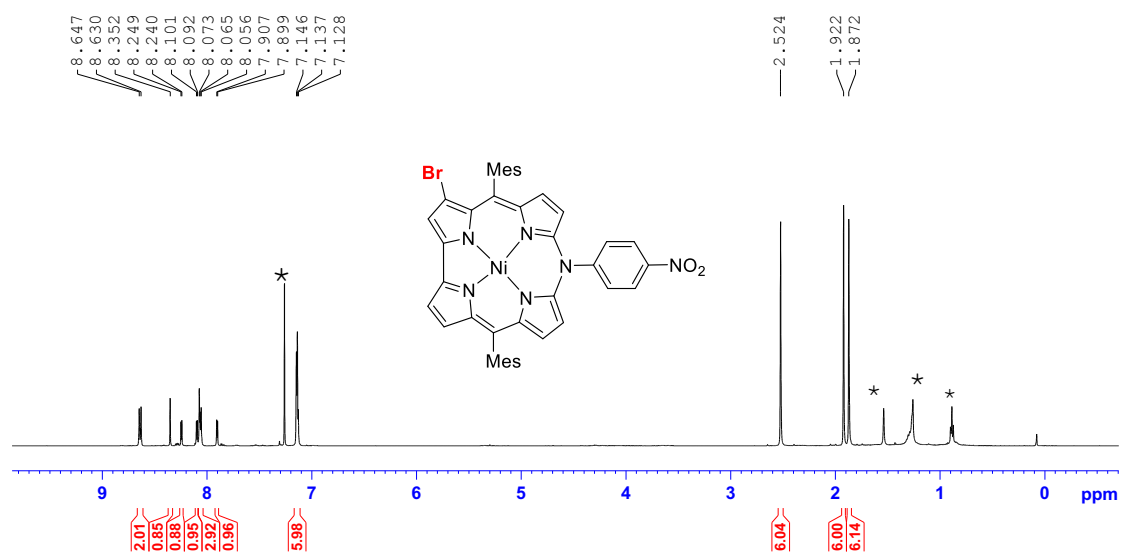

Figure S24. <sup>1</sup>H NMR spectrum of **8** (500MHz, 298 K, CDCl<sub>3</sub>).

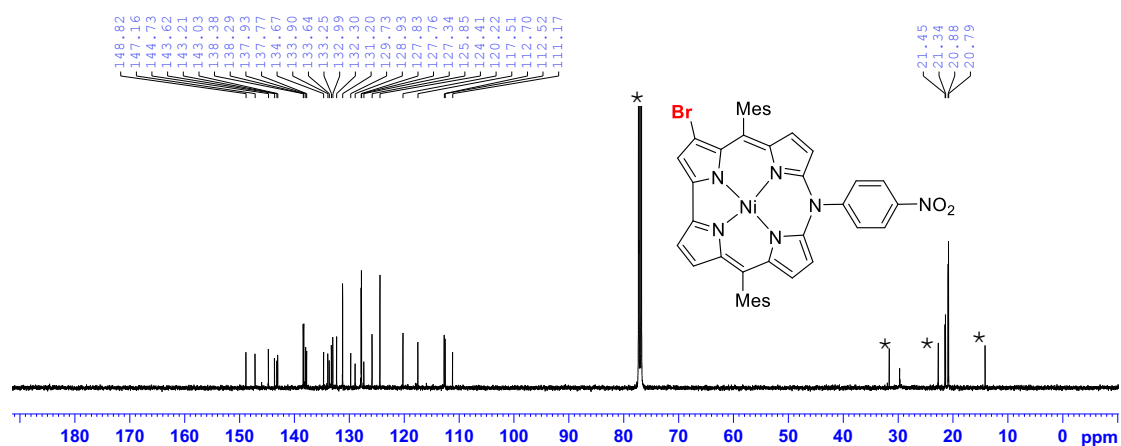

Figure S25. <sup>13</sup>C NMR spectrum of **8** (125 MHz, 298 K, CDCl<sub>3</sub>).

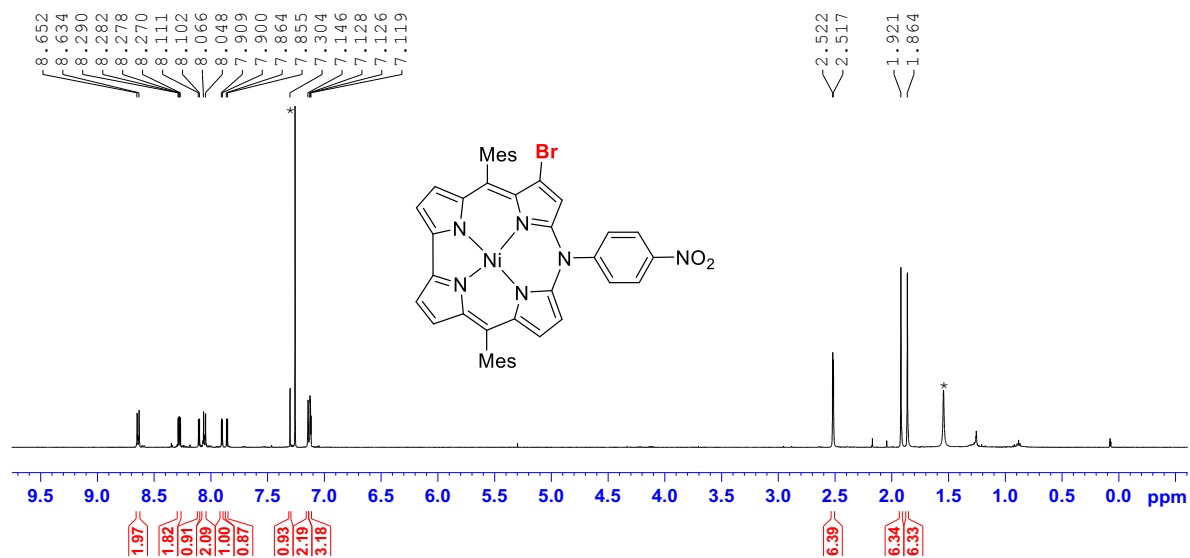

Figure S26. <sup>1</sup>H NMR spectrum of 9 (500MHz, 298 K, CDCl<sub>3</sub>).

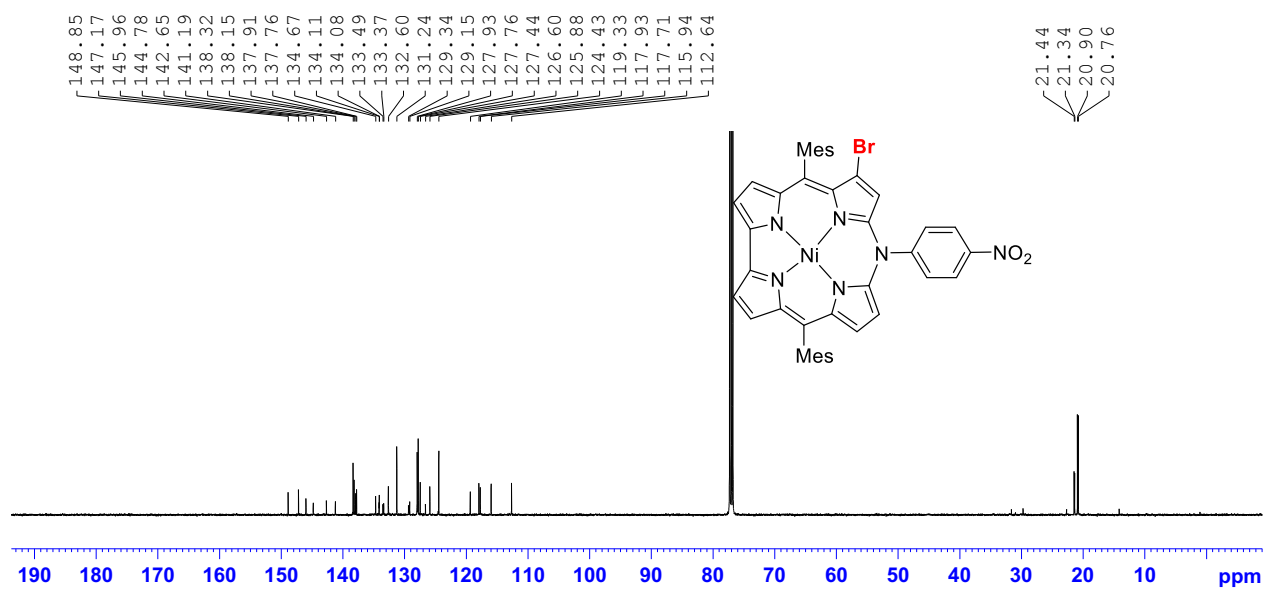

Figure S27. <sup>13</sup>C NMR spectrum of 9 (125 MHz, 298 K, CDCl<sub>3</sub>).





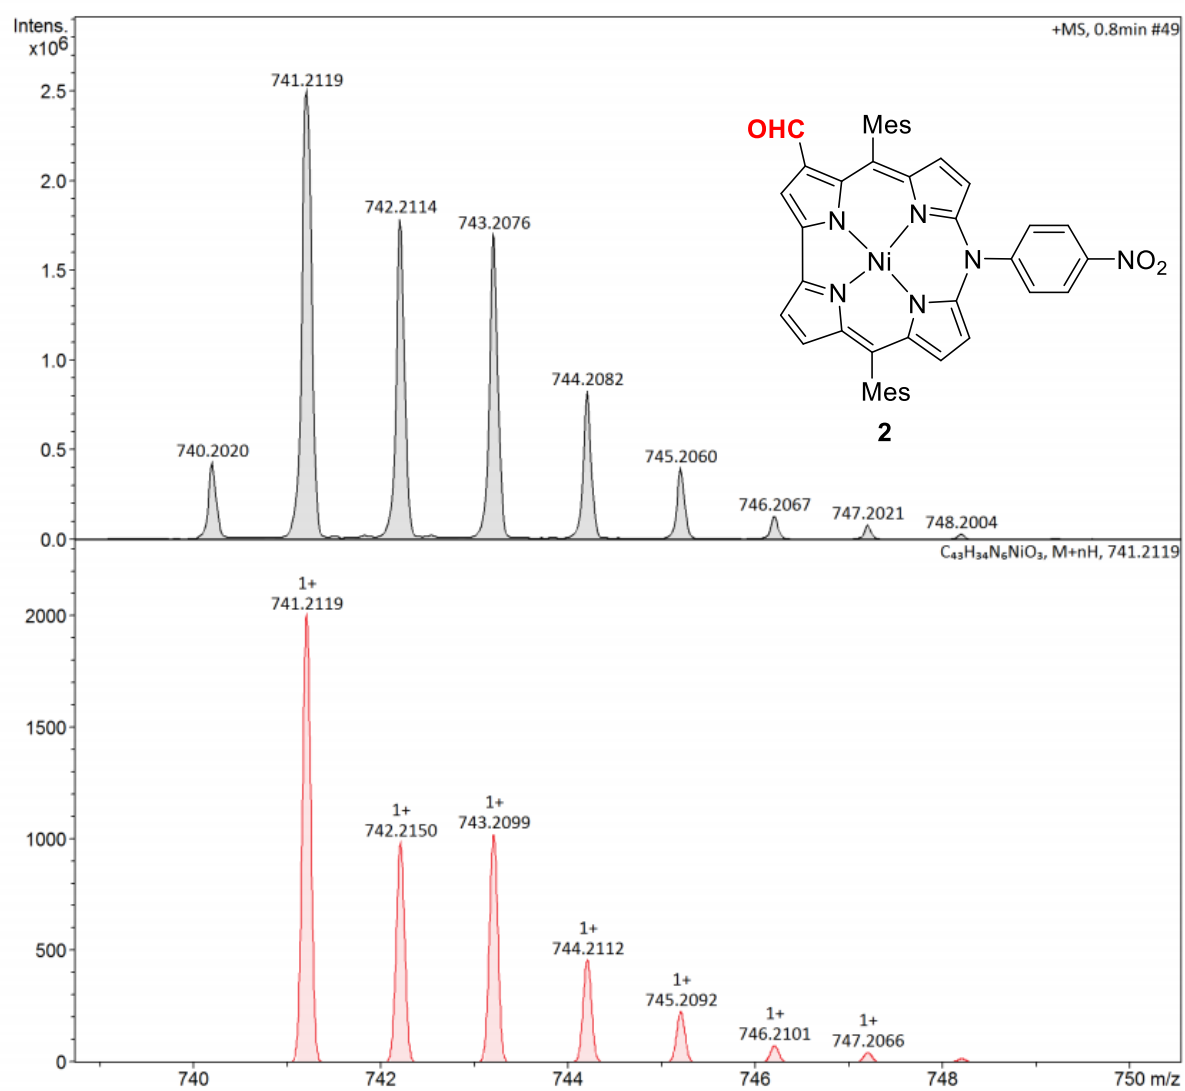

Figure S30. HR-APCI-TOF-MS spectrum of **2** (experimental: upper trace; simulated: red bottom trace).

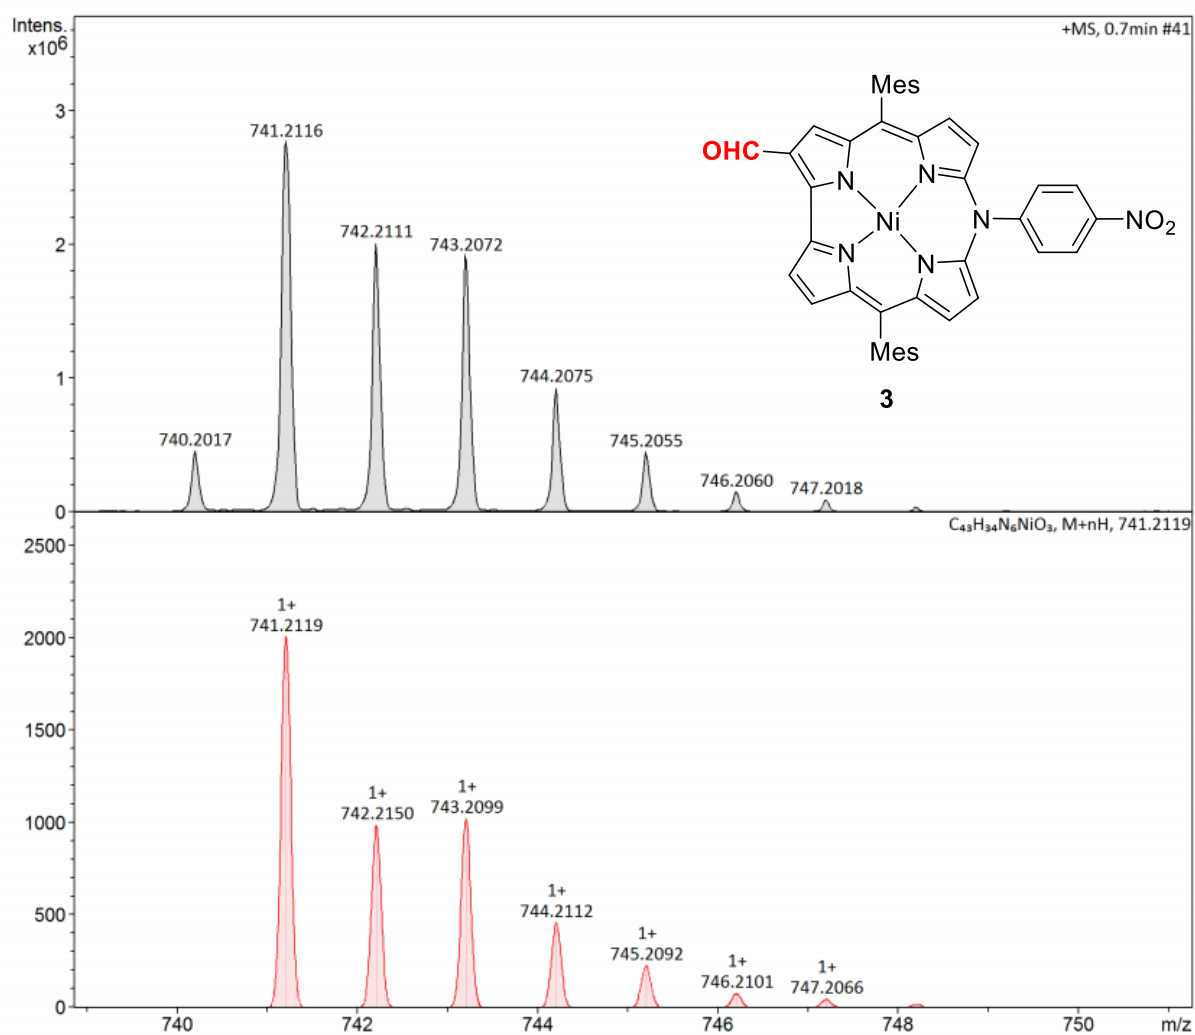

Figure S31. HR-APCI-TOF-MS spectrum of **3** (experimental: upper trace; simulated: red bottom trace).

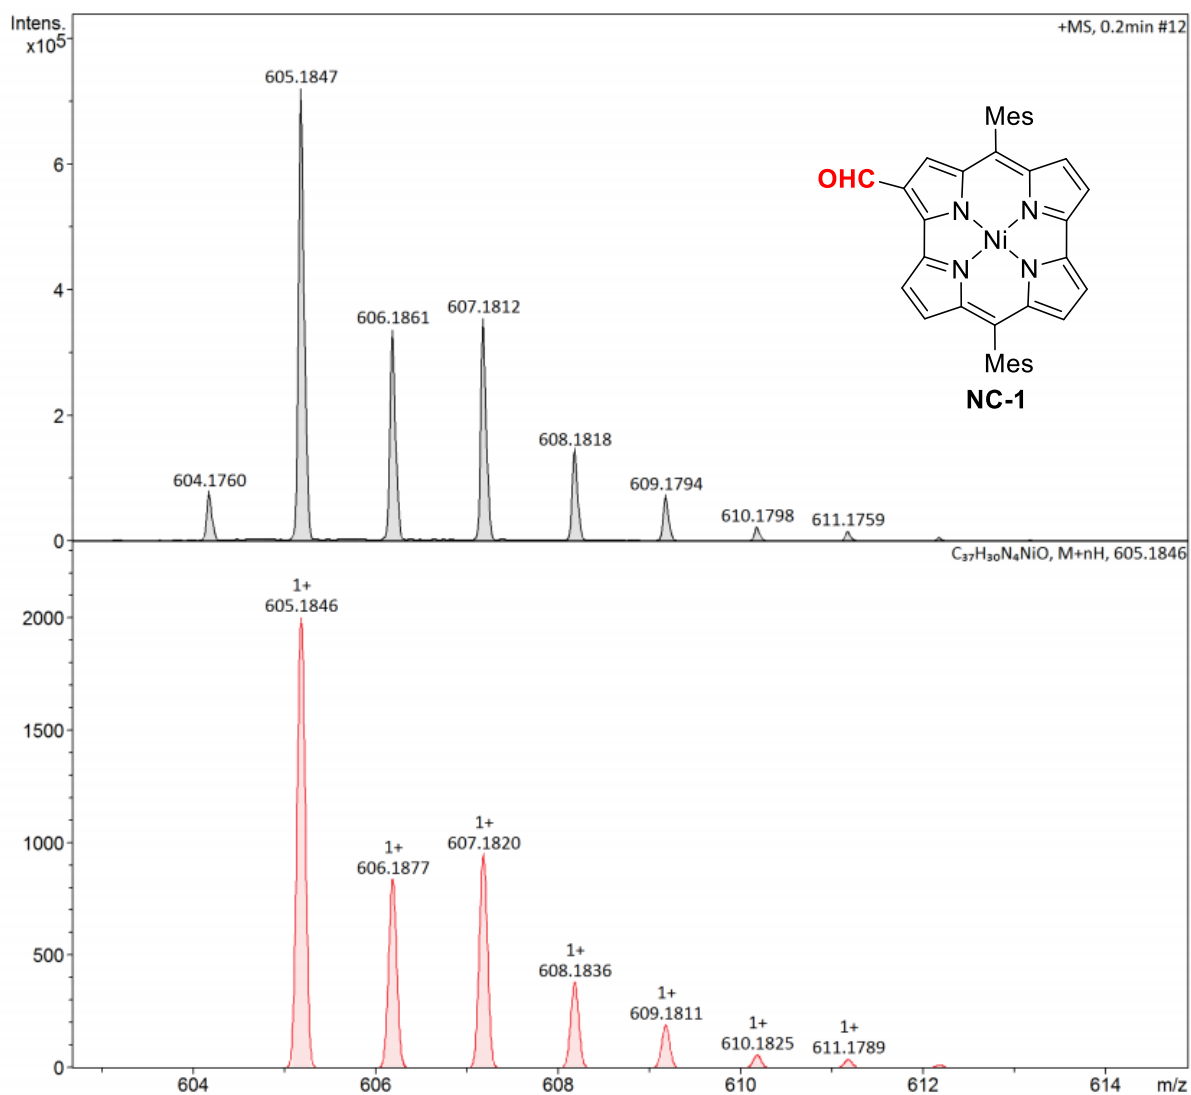

**Figure S32.** HR-APCI-TOF-MS spectrum of **NC-1** (experimental: upper trace; simulated: red bottom trace).

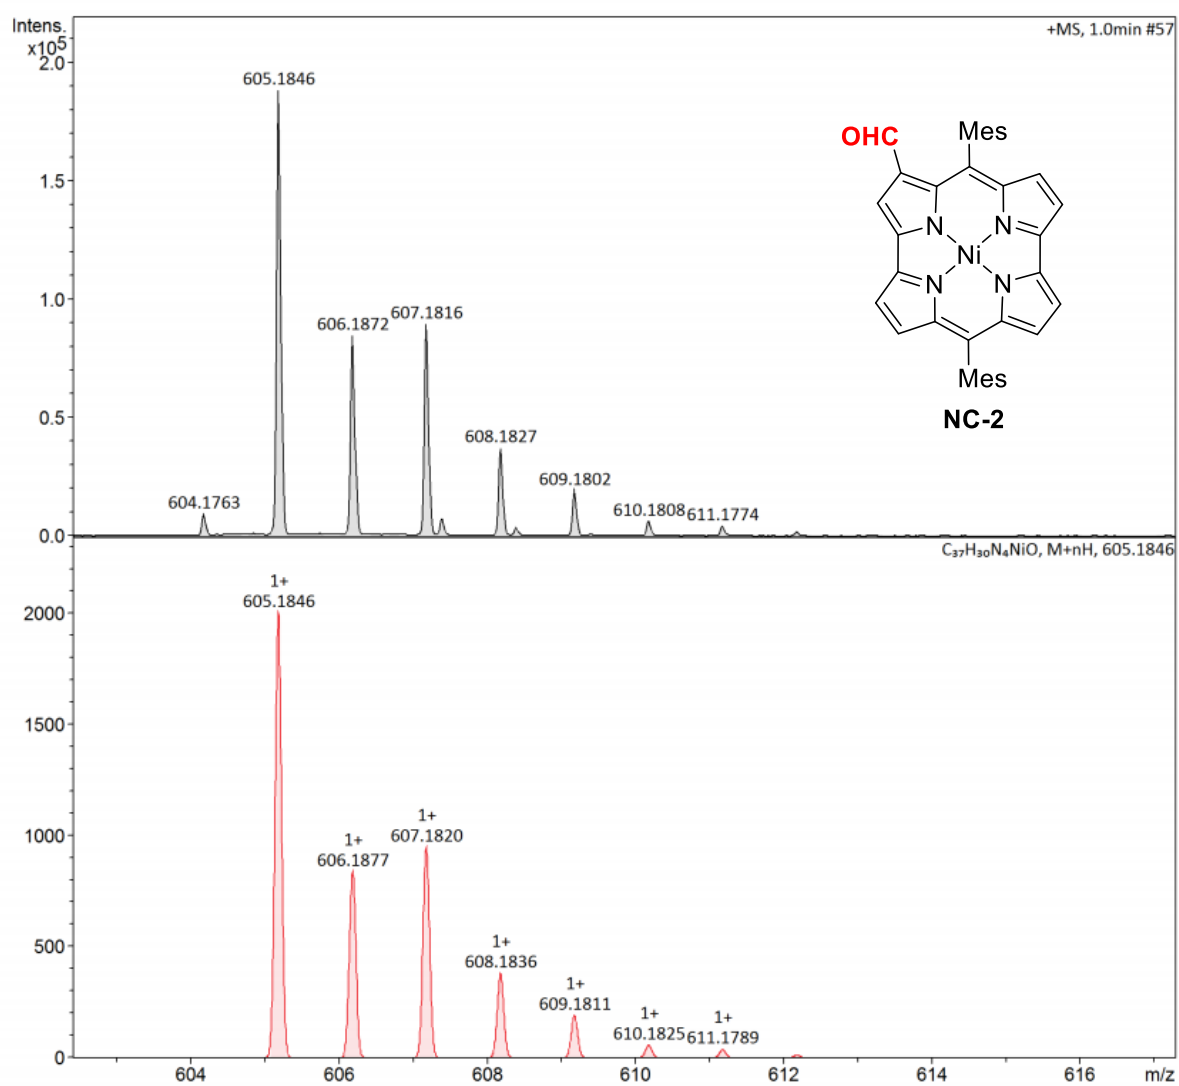

**Figure S33.** HR-APCI-TOF-MS spectrum of **NC-2** (experimental: upper trace; simulated: red bottom trace).

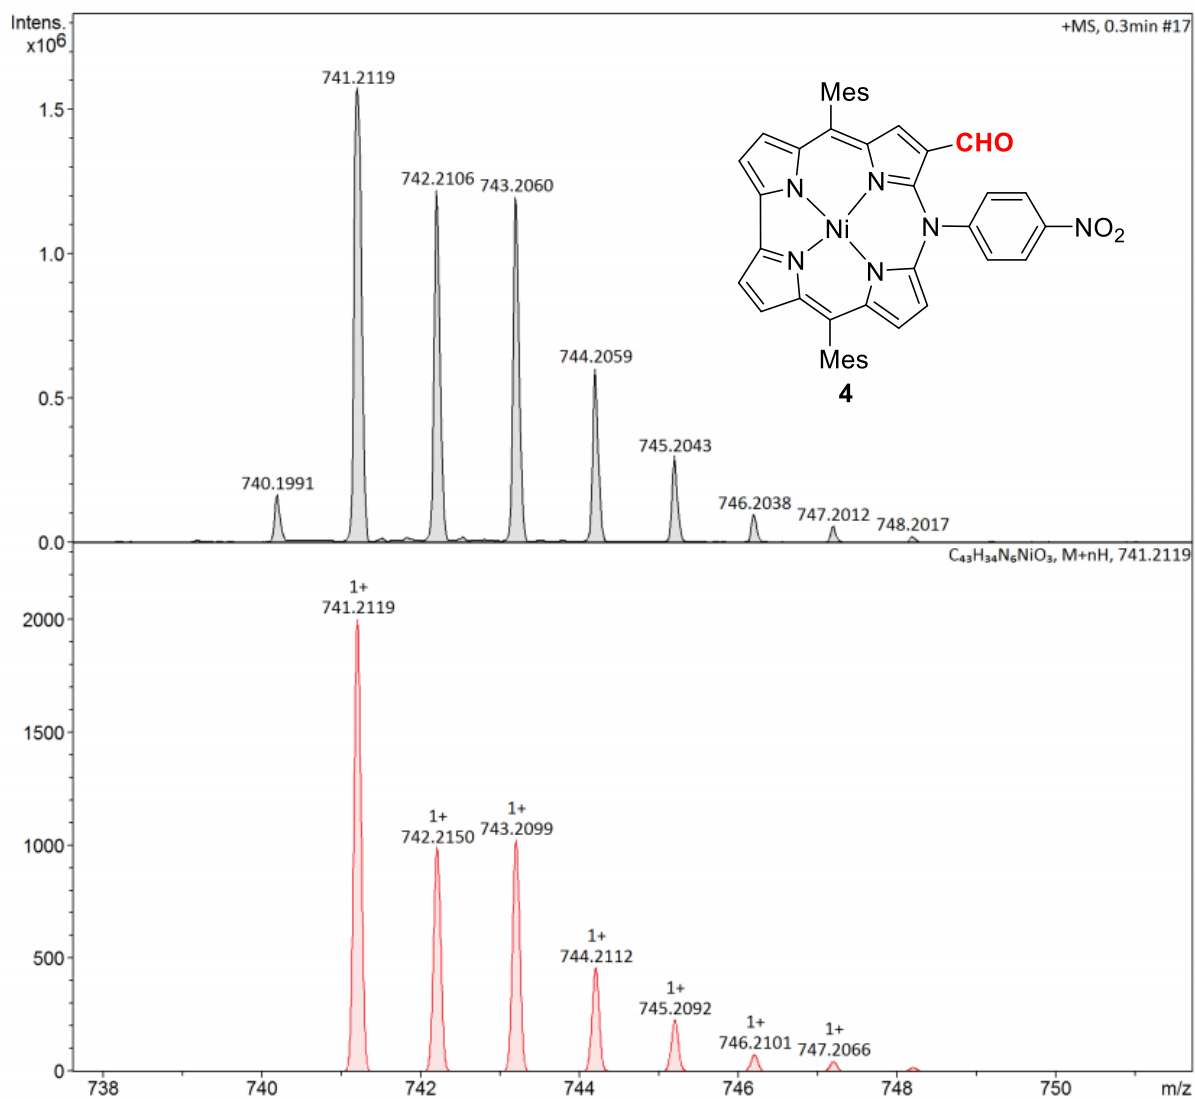

Figure S34. HR-APCI-TOF-MS spectrum of **4** (experimental: upper trace; simulated: red bottom trace).

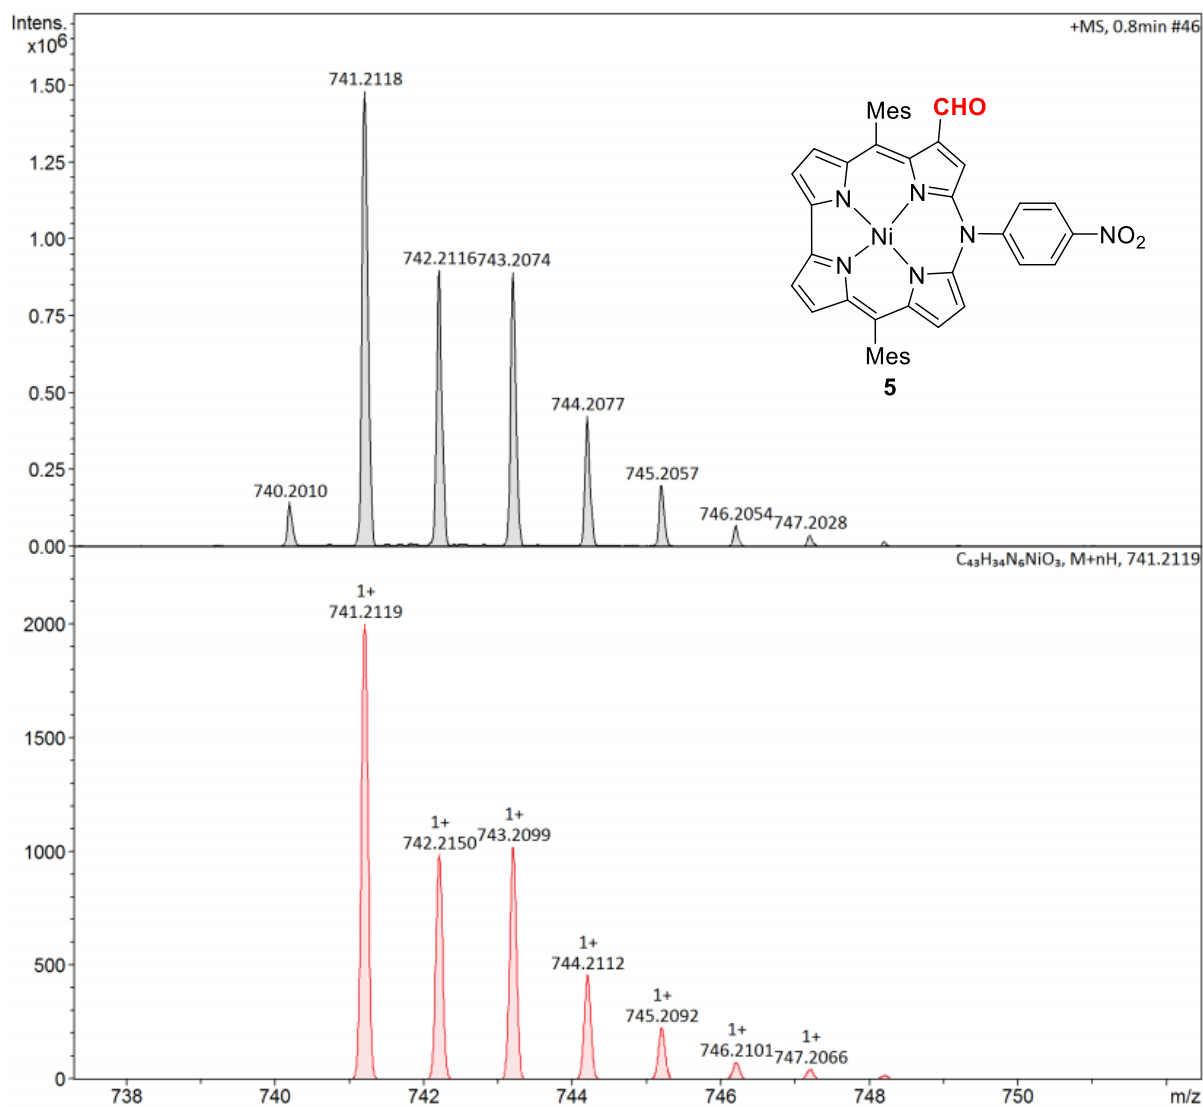

Figure S35. HR-APCI-TOF-MS spectrum of **5** (experimental: upper trace; simulated: red bottom trace).

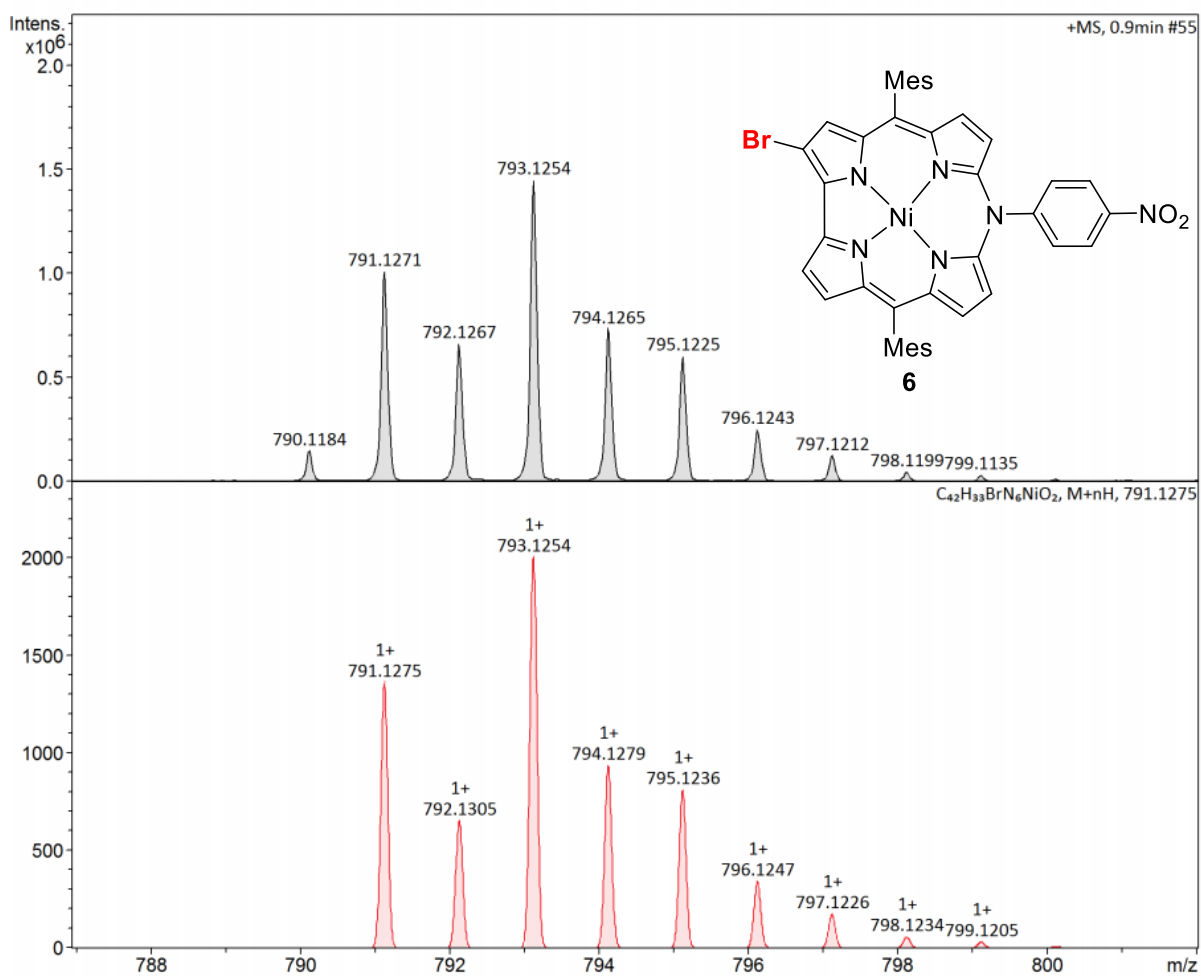

Figure S36. HR-APCI-TOF-MS spectrum of **6** (experimental: upper trace; simulated: red bottom trace).

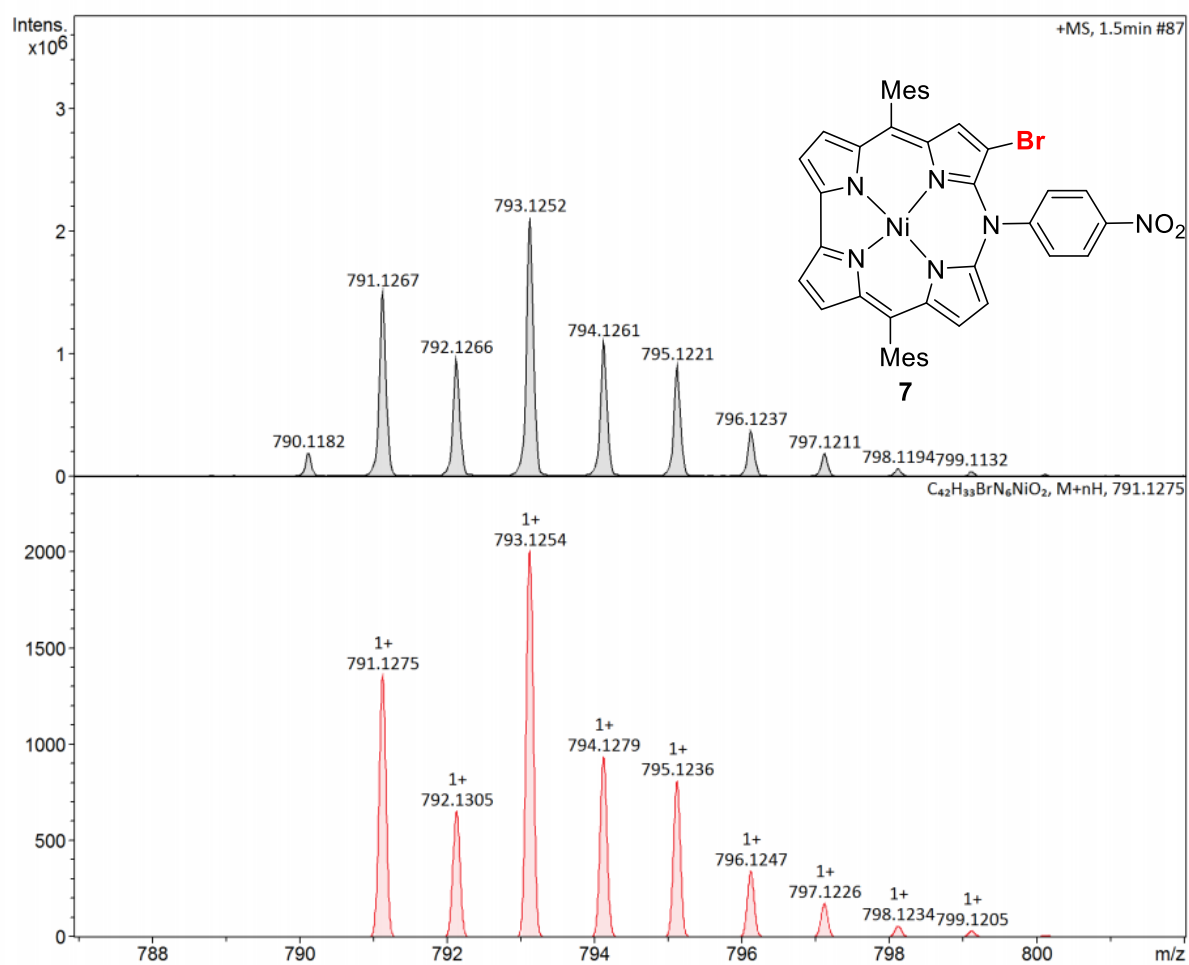

Figure S37. HR-APCI-TOF-MS spectrum of **7** (experimental: upper trace; simulated: red bottom trace).



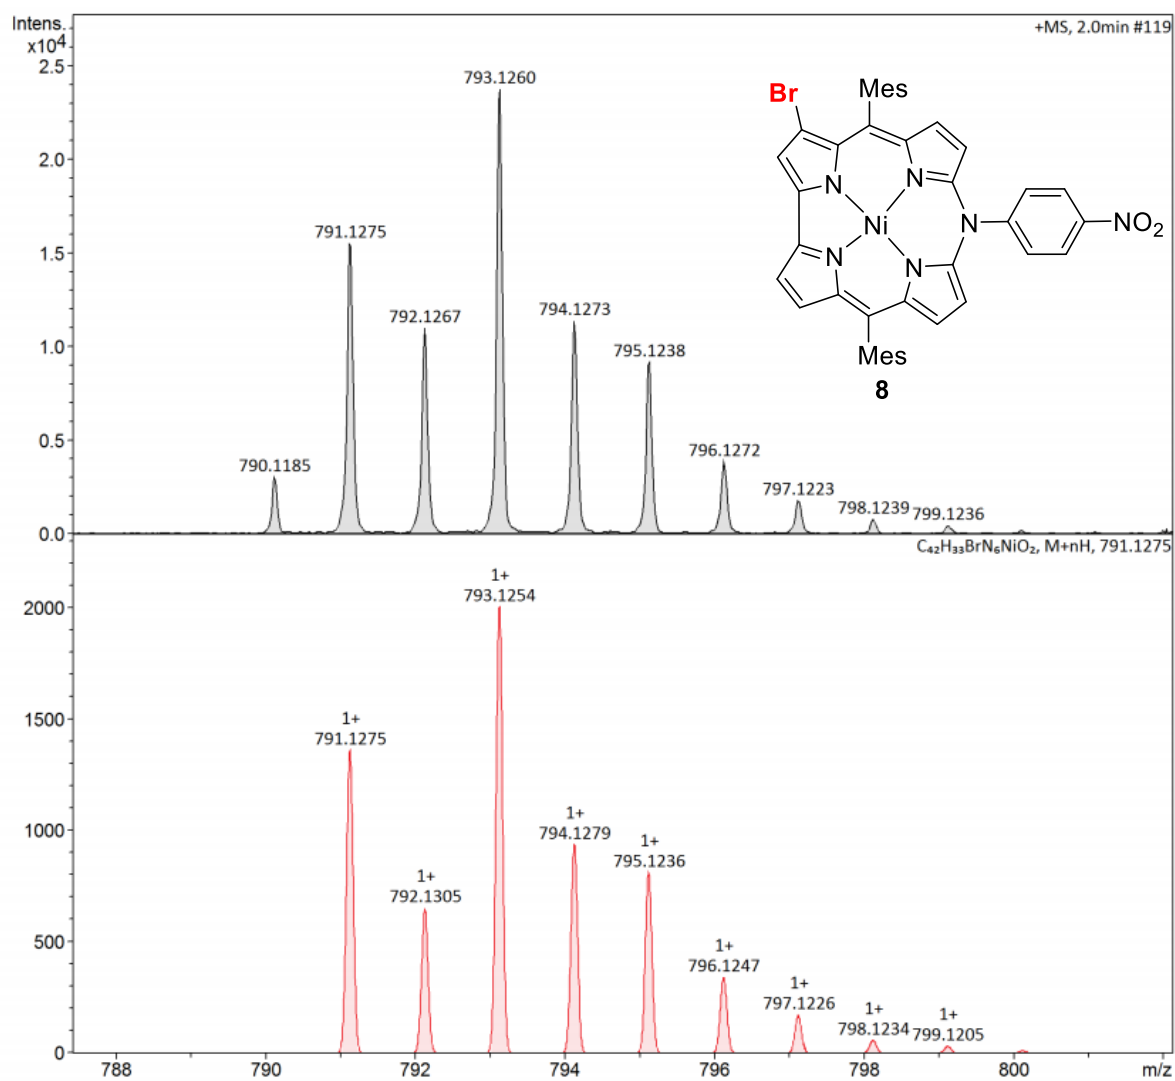

Figure S38. HR-APCI-TOF-MS spectrum of **8** (experimental: upper trace; simulated: red bottom trace).

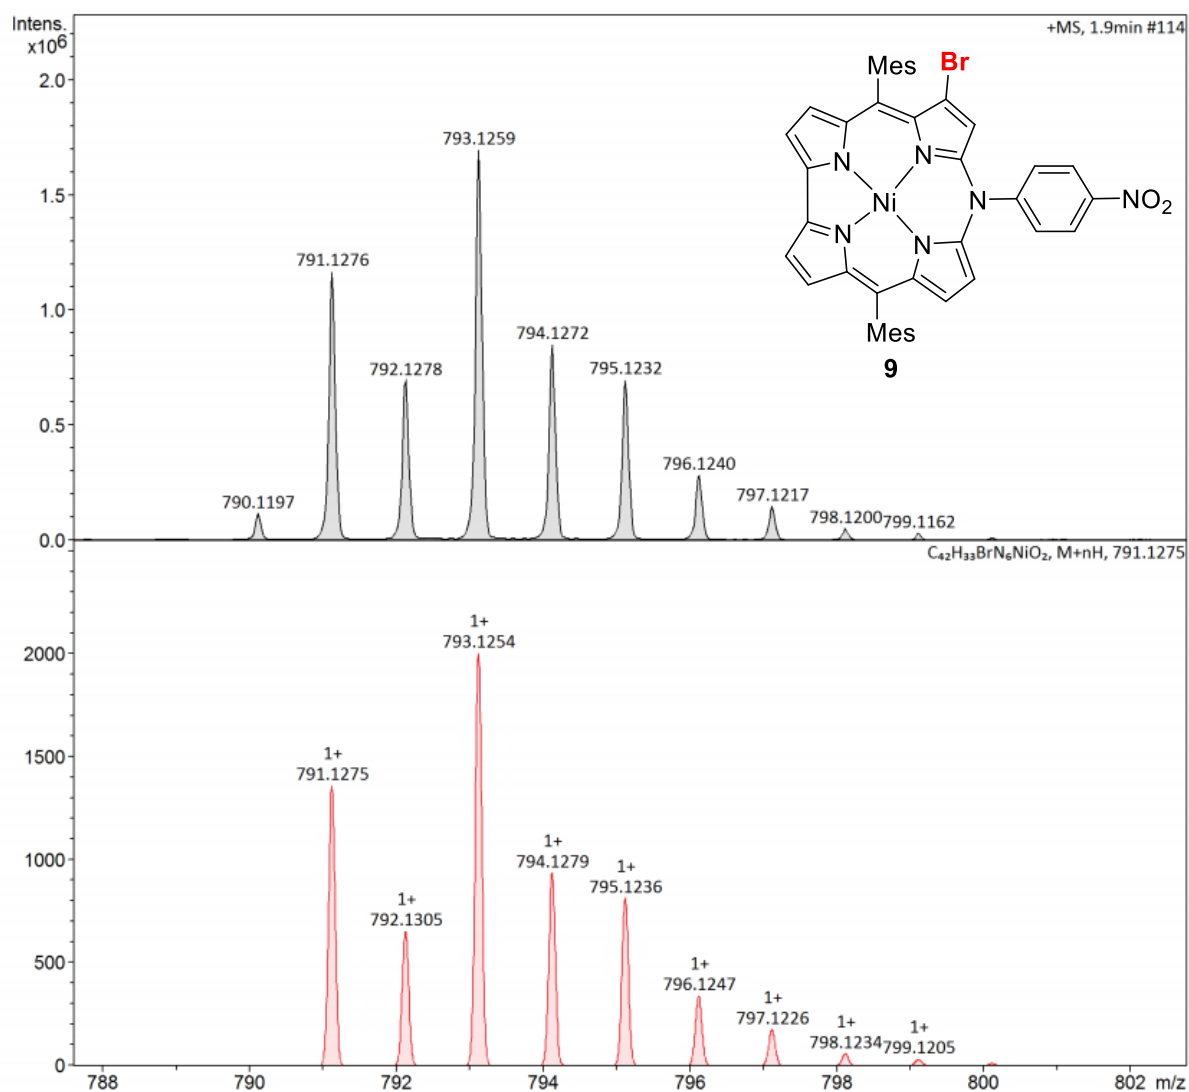

Figure S39. HR-APCI-TOF-MS spectrum of **9** (experimental: upper trace; simulated: red bottom trace).

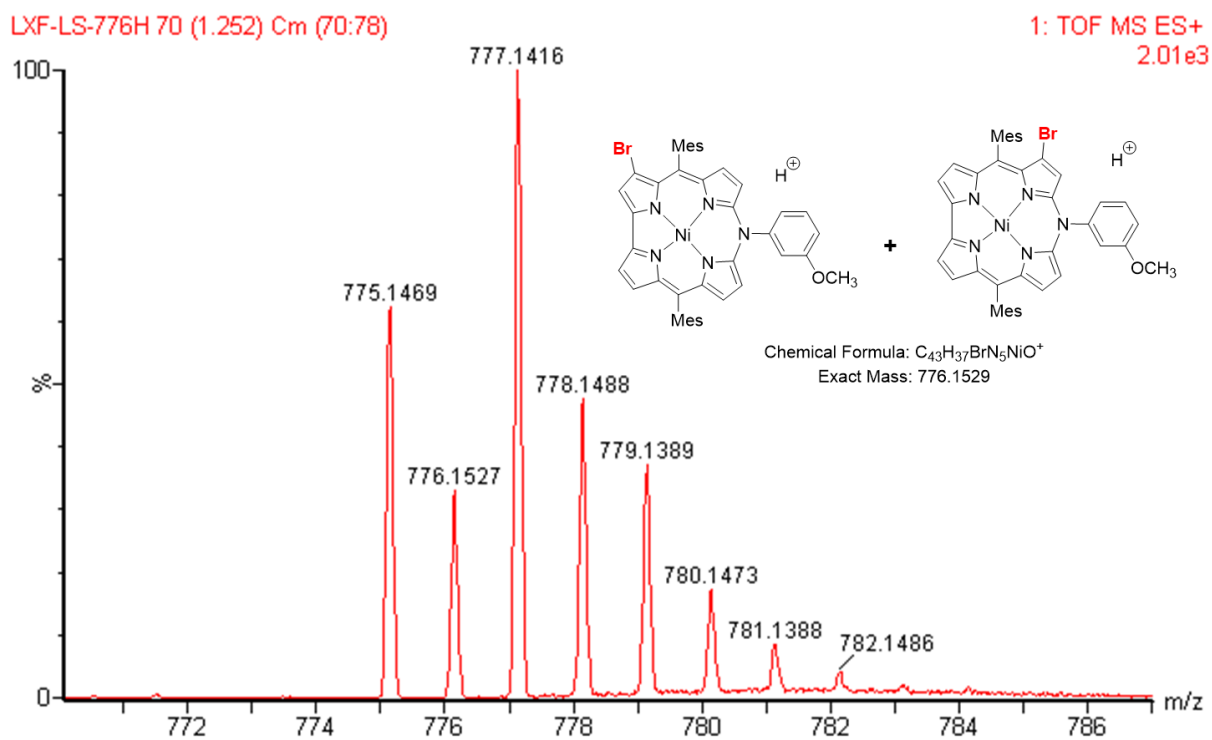

Figure S40. HR-ESI-MS spectrum of a mixture of **10** and **11**.

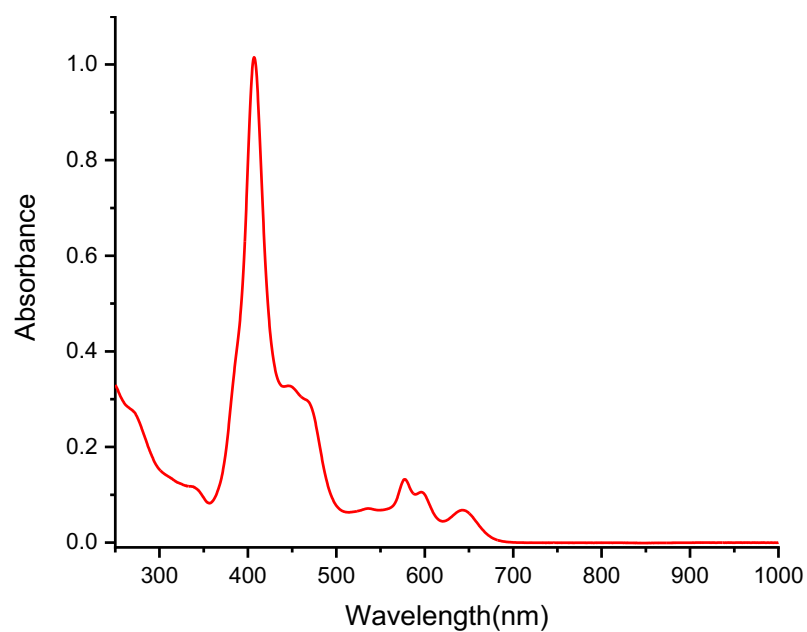

Figure S41. UV-vis absorption spectrum of **2** in  $CH_2Cl_2$ .

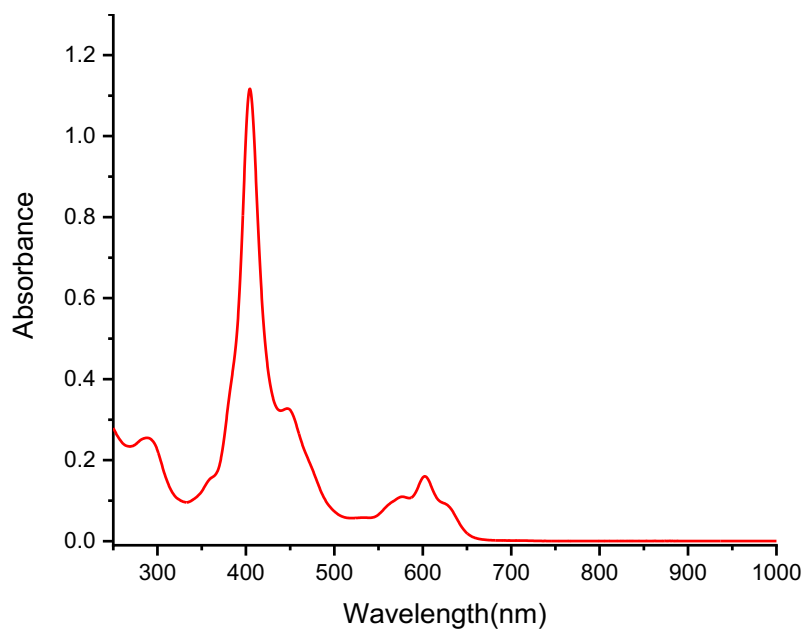

**Figure S42.** UV-vis absorption spectrum of **3** in  $\text{CH}_2\text{Cl}_2$ .

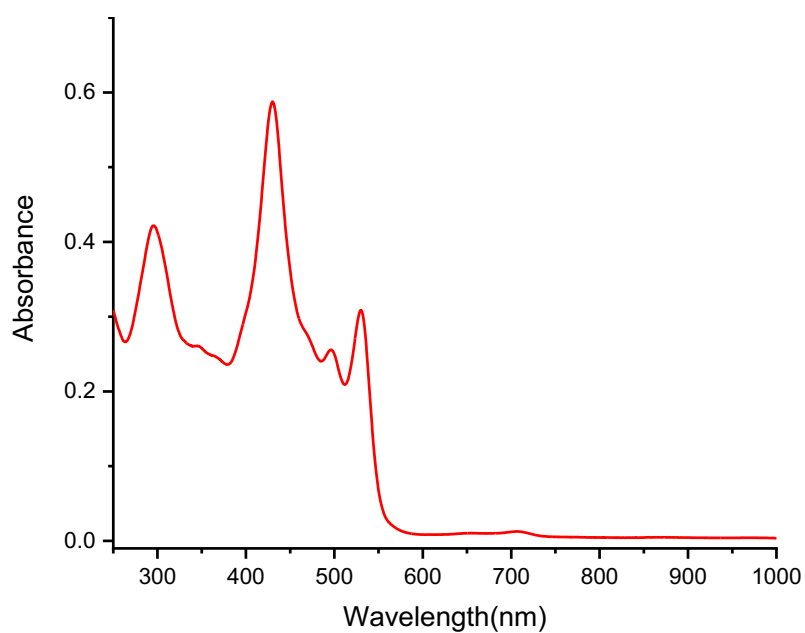

**Figure S43.** UV-vis absorption spectrum of **NC-1** in  $\text{CH}_2\text{Cl}_2$ .

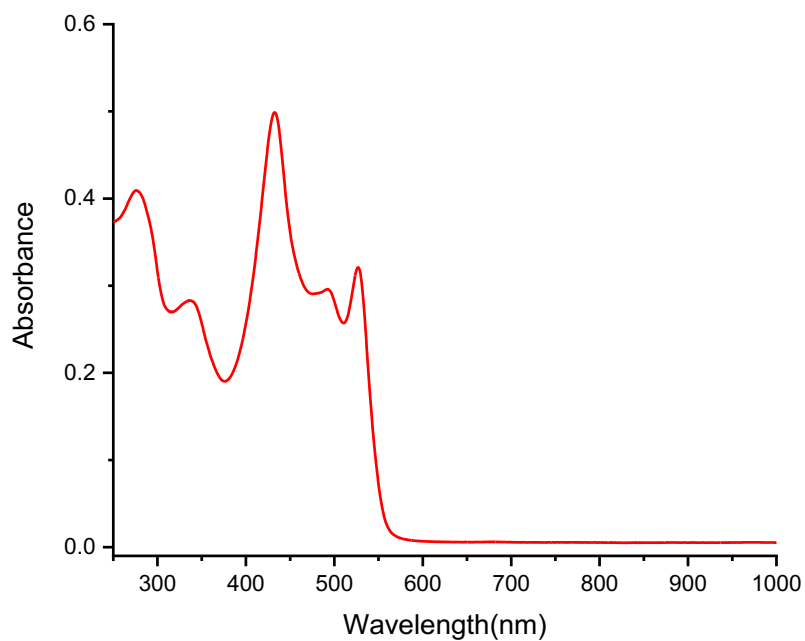

**Figure S44.** UV-vis absorption spectrum of **NC-2** in CH<sub>2</sub>Cl<sub>2</sub>.

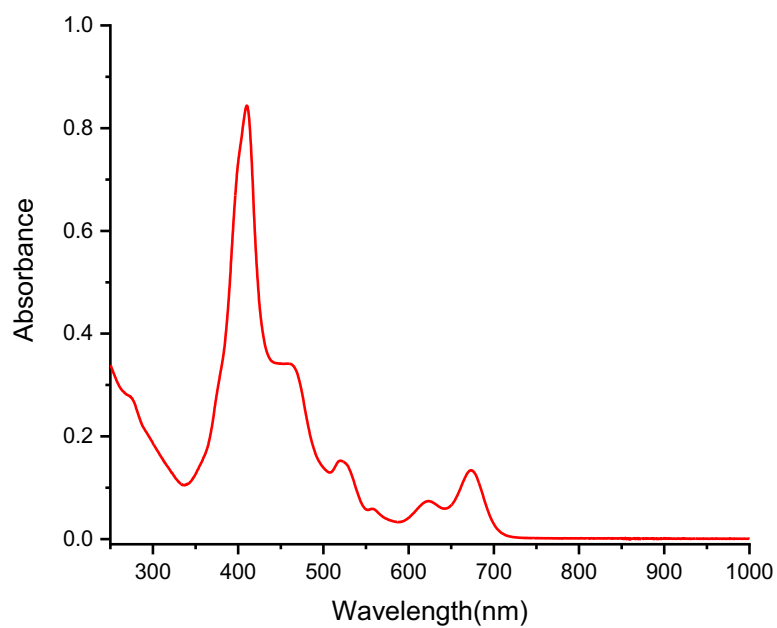

**Figure S45.** UV-vis absorption spectrum of **4** in CH<sub>2</sub>Cl<sub>2</sub>.

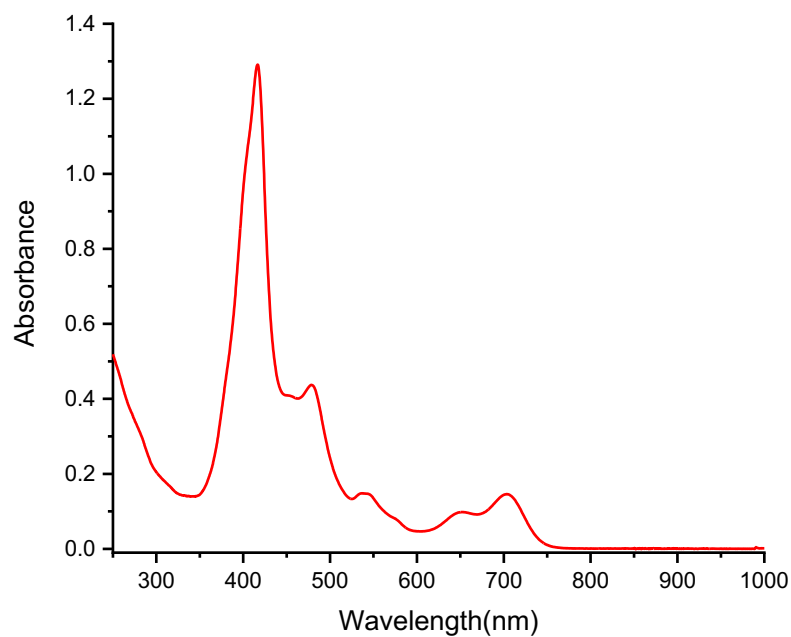

Figure S46. UV-vis absorption spectrum of **5** in CH<sub>2</sub>Cl<sub>2</sub>.

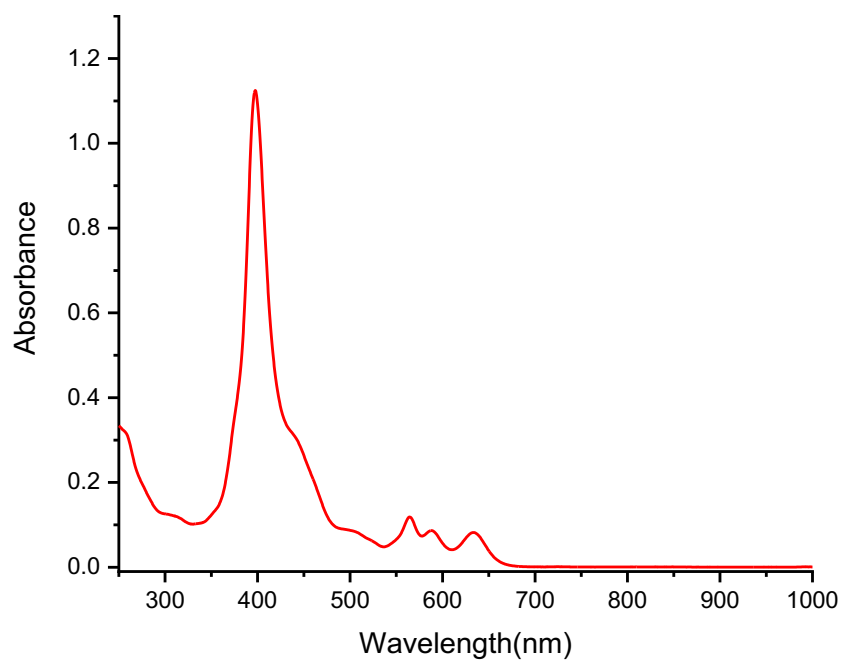

Figure S47. UV-vis absorption spectrum of **6** in CH<sub>2</sub>Cl<sub>2</sub>.

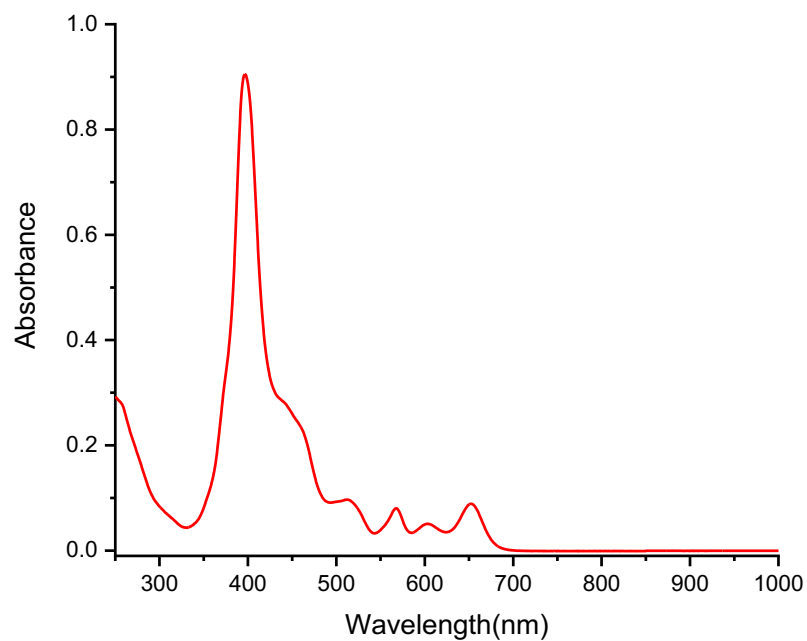

**Figure S48.** UV-vis absorption spectrum of **7** in CH<sub>2</sub>Cl<sub>2</sub>.

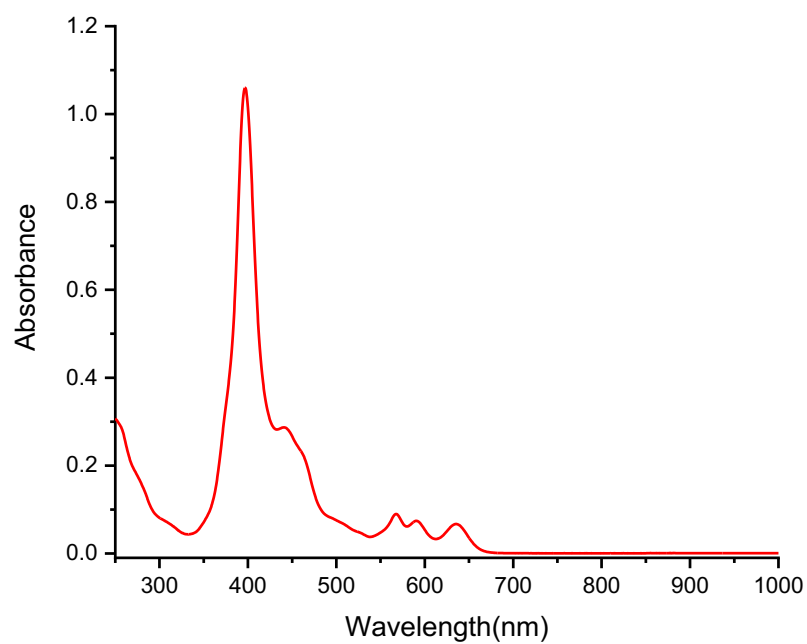

**Figure S49.** UV-vis absorption spectrum of **8** in CH<sub>2</sub>Cl<sub>2</sub>.

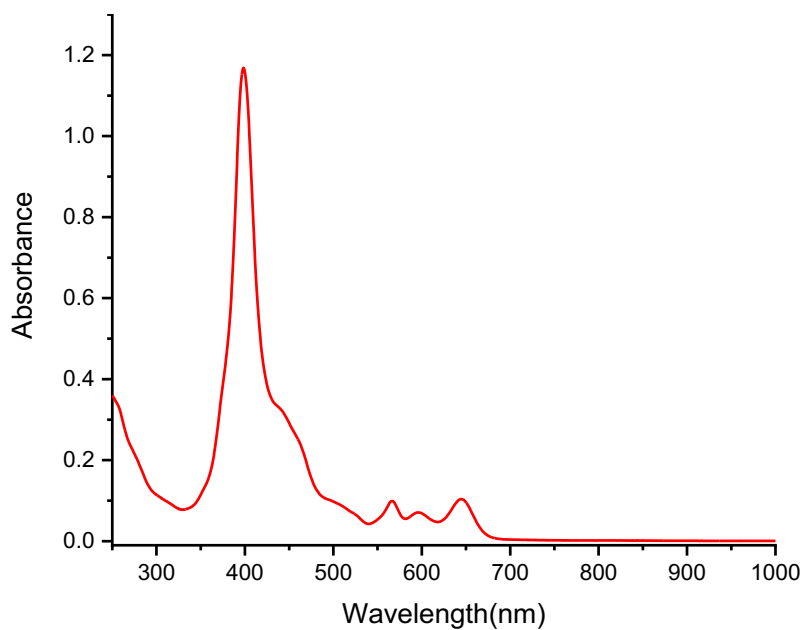

**Figure S50.** UV-vis absorption spectrum of **9** in CH<sub>2</sub>Cl<sub>2</sub>.

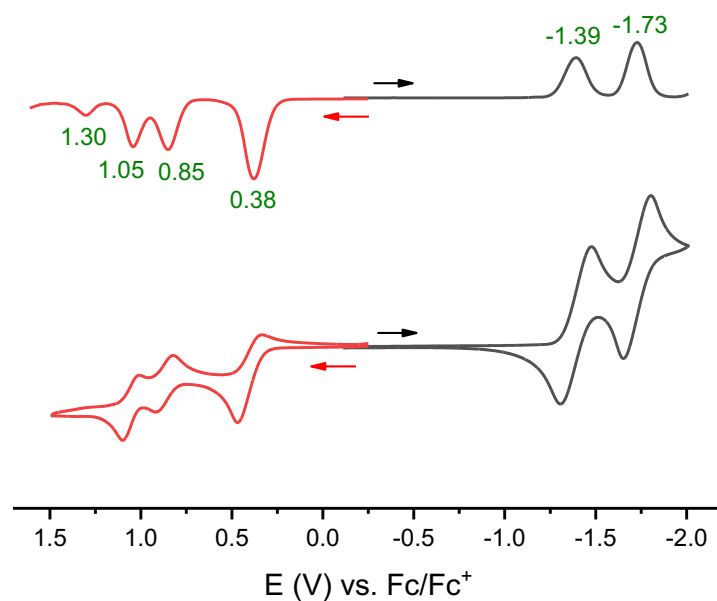

**Figure S51** Cyclic (lower traces) and differential pulse (upper traces) voltammograms for **2** in dichloromethane solution. The green numbers are the electrode potentials in volts. The horizontal arrows indicate directions of the potential advances.



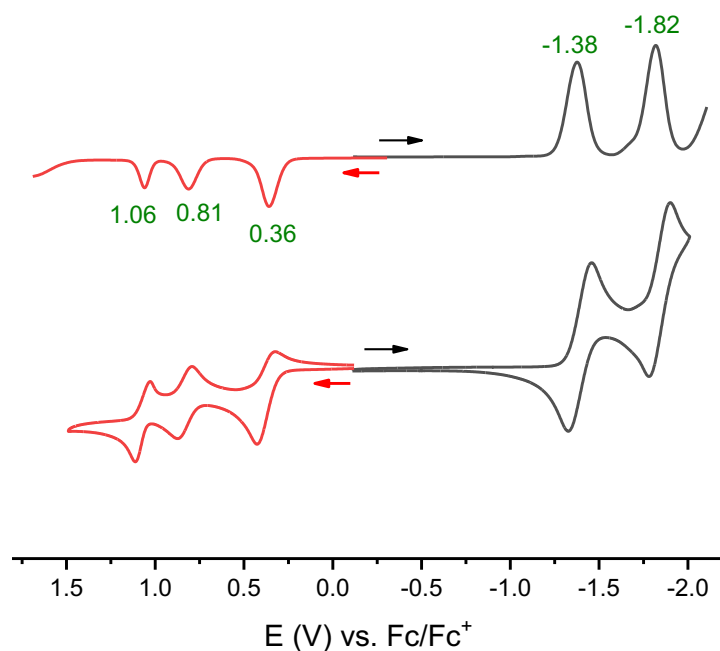

**Figure S52** Cyclic (lower traces) and differential pulse (upper traces) voltammograms for **3** in dichloromethane solution. The green numbers are the electrode potentials in volts. The horizontal arrows indicate directions of the potential advances.

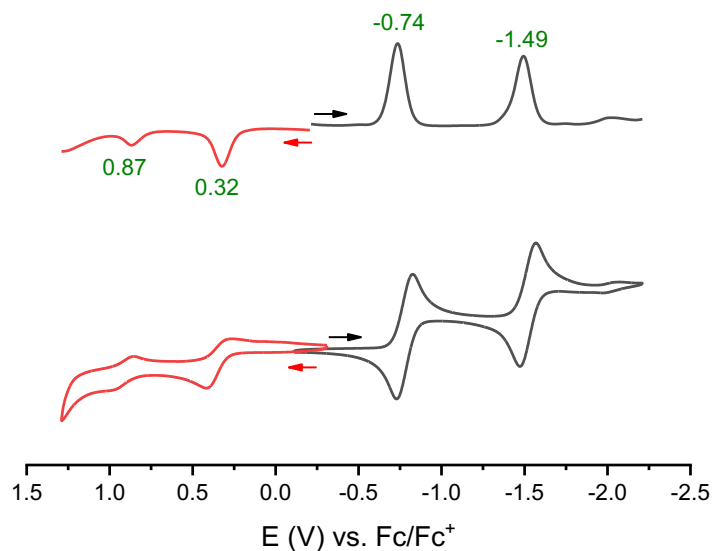

**Figure S53** Cyclic (lower traces) and differential pulse (upper traces) voltammograms for **NC-1** in dichloromethane solution. The green numbers are the electrode potentials in volts. The horizontal arrows indicate directions of the potential advances.

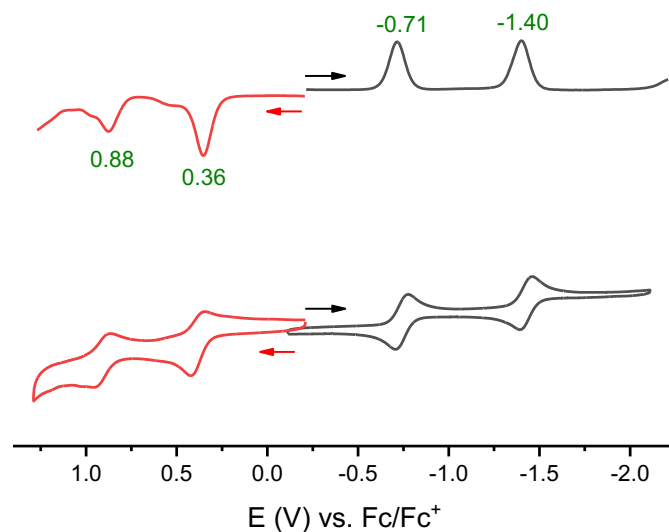

**Figure S54** Cyclic (lower traces) and differential pulse (upper traces) voltammograms for **NC-2** in dichloromethane solution. The green numbers are the electrode potentials in volts. The horizontal arrows indicate directions of the potential advances.

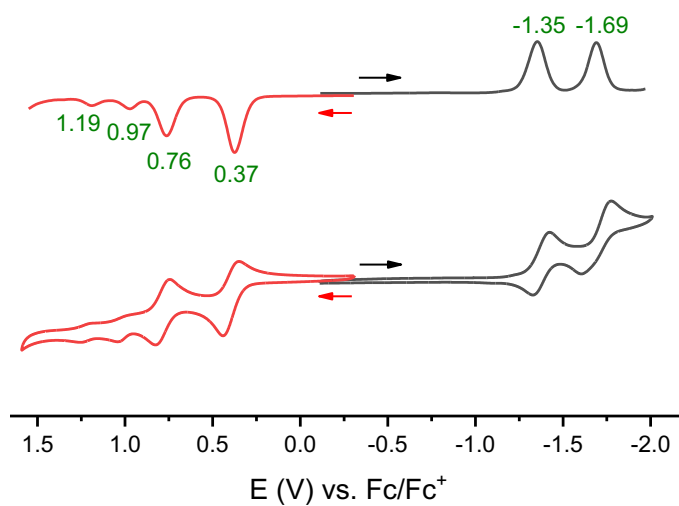

**Figure S55** Cyclic (lower traces) and differential pulse (upper traces) voltammograms for **4** in dichloromethane solution. The green numbers are the electrode potentials in volts. The horizontal arrows indicate directions of the potential advances.

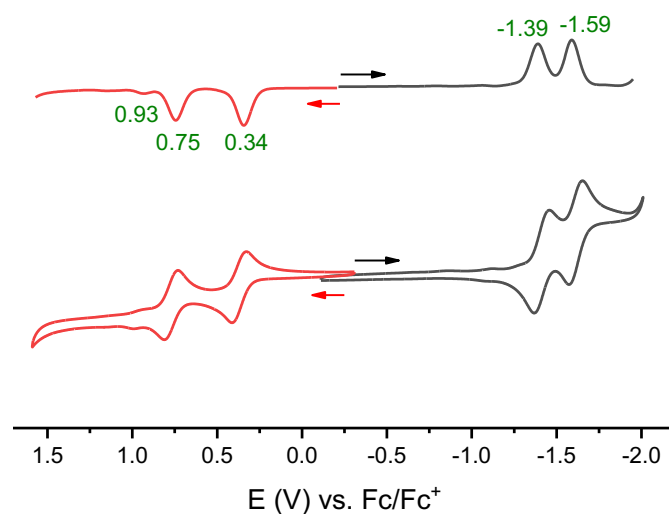

**Figure S56** Cyclic (lower traces) and differential pulse (upper traces) voltammograms for **5** in dichloromethane solution. The green numbers are the electrode potentials in volts. The horizontal arrows indicate directions of the potential advances.

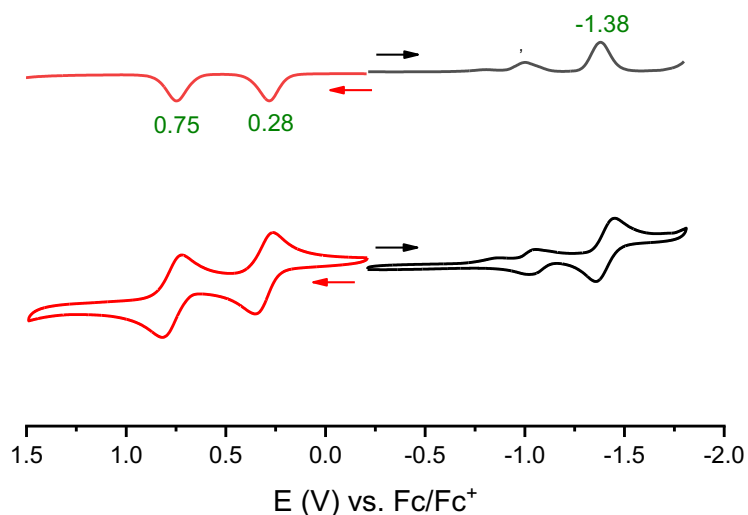

**Figure S57** Cyclic (lower traces) and differential pulse (upper traces) voltammograms for **6** in dichloromethane solution. The green numbers are the electrode potentials in volts. The horizontal arrows indicate directions of the potential advances.

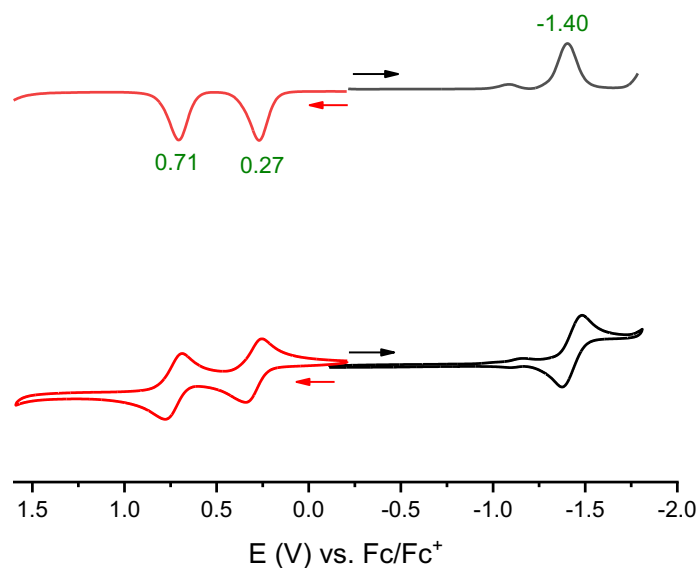

**Figure S58** Cyclic (lower traces) and differential pulse (upper traces) voltammograms for **7** in dichloromethane solution. The green numbers are the electrode potentials in volts. The horizontal arrows indicate directions of the potential advances.

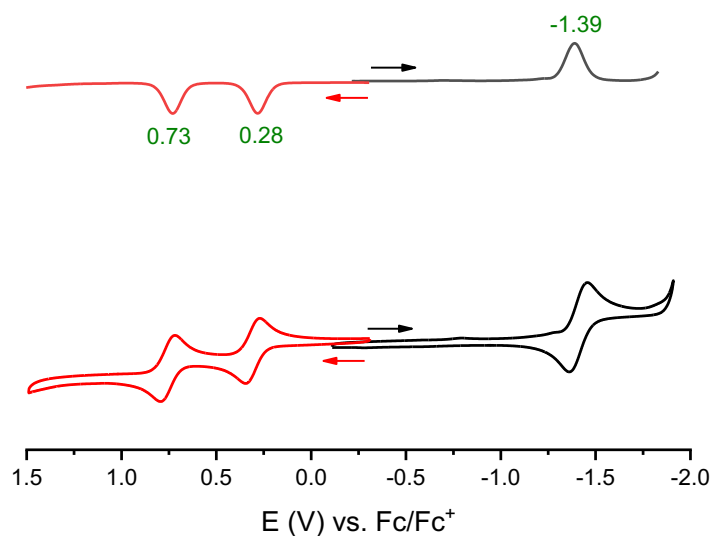

**Figure S59** Cyclic (lower traces) and differential pulse (upper traces) voltammograms for **8** in dichloromethane solution. The green numbers are the electrode potentials in volts. The horizontal arrows indicate directions of the potential advances.

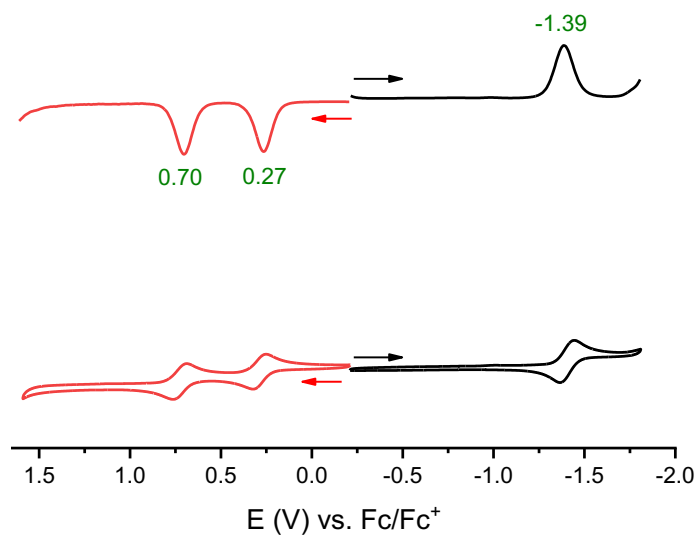

**Figure S60** Cyclic (lower traces) and differential pulse (upper traces) voltammograms for **9** in dichloromethane solution. The green numbers are the electrode potentials in volts. The horizontal arrows indicate directions of the potential advances.

**Table S1.** Selected absorption wavelengths, energies, and oscillator strengths ( $f$ ) of **2**, **3**, **4** and **5** calculated at the TD-B3LYP/6-31G(d)+SDD level.

| Compound | State                      | $\lambda$ [nm] | energy [eV] | $f$    | Major transition                                                                          |
|----------|----------------------------|----------------|-------------|--------|-------------------------------------------------------------------------------------------|
| <b>2</b> | S <sub>1</sub>             | 675.12         | 1.8365      | 0.0000 | HOMO→LUMO (99.5%)                                                                         |
|          | S <sub>2</sub>             | 571.08         | 2.1711      | 0.0000 | HOMO-1→LUMO (99.3%)                                                                       |
|          | S <sub>3</sub><br>(Q-band) | 553.86         | 2.2385      | 0.0614 | HOMO-3→LUMO+1 (3.1%)<br>HOMO-1→LUMO+2 (4.7%)<br>HOMO→LUMO+1 (89.0%)                       |
| <b>3</b> | S <sub>1</sub>             | 682.68         | 1.8161      | 0.0000 | HOMO→LUMO (99.5%)                                                                         |
|          | S <sub>2</sub>             | 578.88         | 2.1418      | 0.0001 | HOMO-1→LUMO (99.3%)                                                                       |
|          | S <sub>3</sub><br>(Q-band) | 537.23         | 2.3078      | 0.0636 | HOMO-1→LUMO+1 (2.2%)<br>HOMO-1→LUMO+2 (5.6%)<br>HOMO→LUMO+1 (76.4%)<br>HOMO→LUMO+2 (9.5%) |
| <b>4</b> | S <sub>1</sub>             | 642.76         | 1.9289      | 0.0016 | HOMO→LUMO (99.5%)                                                                         |
|          | S <sub>2</sub><br>(Q-band) | 562.53         | 2.2040      | 0.0949 | HOMO-3→LUMO+1 (3.4%)<br>HOMO-1→LUMO (2.1%)<br>HOMO-1→LUMO+2 (3.6%)<br>HOMO→LUMO+1 (87.9%) |
| <b>5</b> | S <sub>1</sub>             | 635.25         | 1.9517      | 0.0000 | HOMO→LUMO (99.7%)                                                                         |
|          | S <sub>2</sub><br>(Q-band) | 591.53         | 2.0960      | 0.0959 | HOMO-3→LUMO+1 (3.2%)<br>HOMO-1→LUMO+ (3.8%)<br>HOMO→LUMO+1 (89.8%)                        |

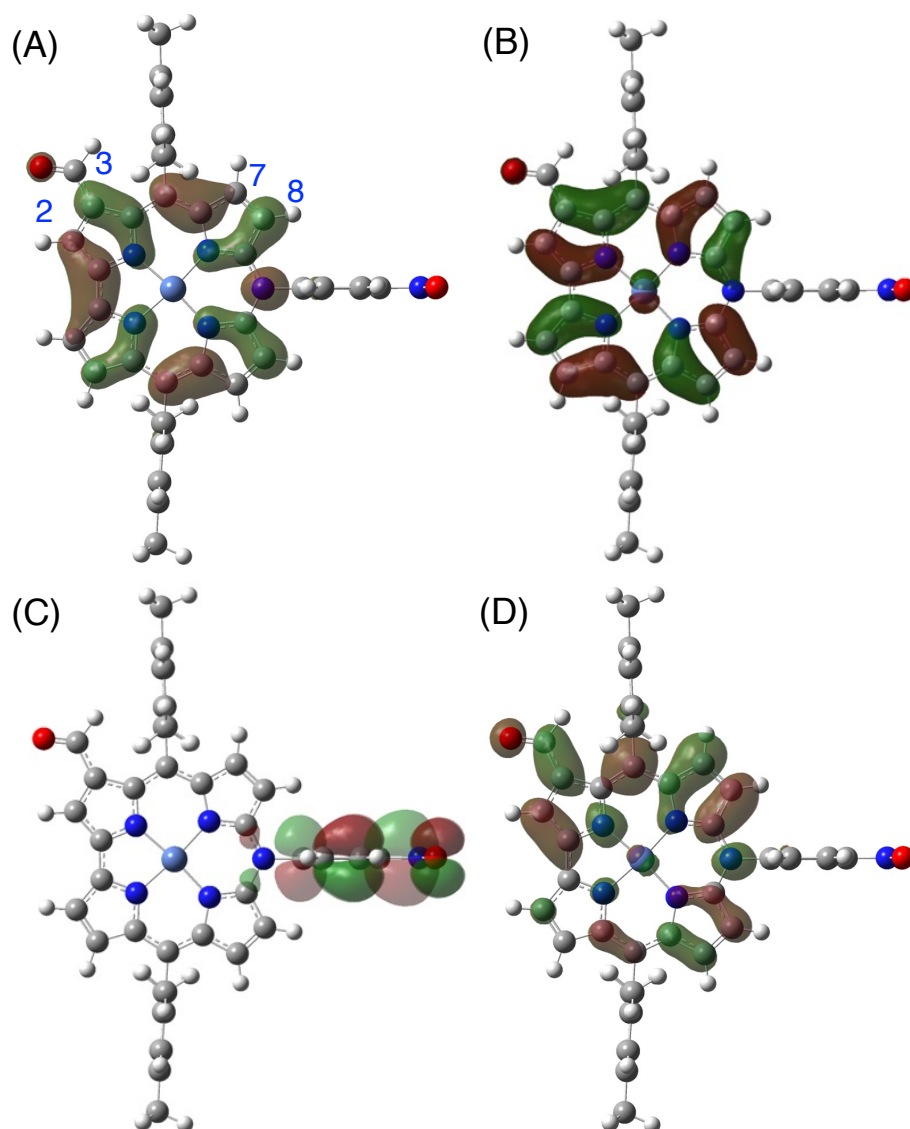

**Figure S61** (A) HOMO-1, (B) HOMO, (C) LUMO and (D) LUMO+1 of azacorrole **2** calculated at the B3LYP/6-31G(d)+SDD level.

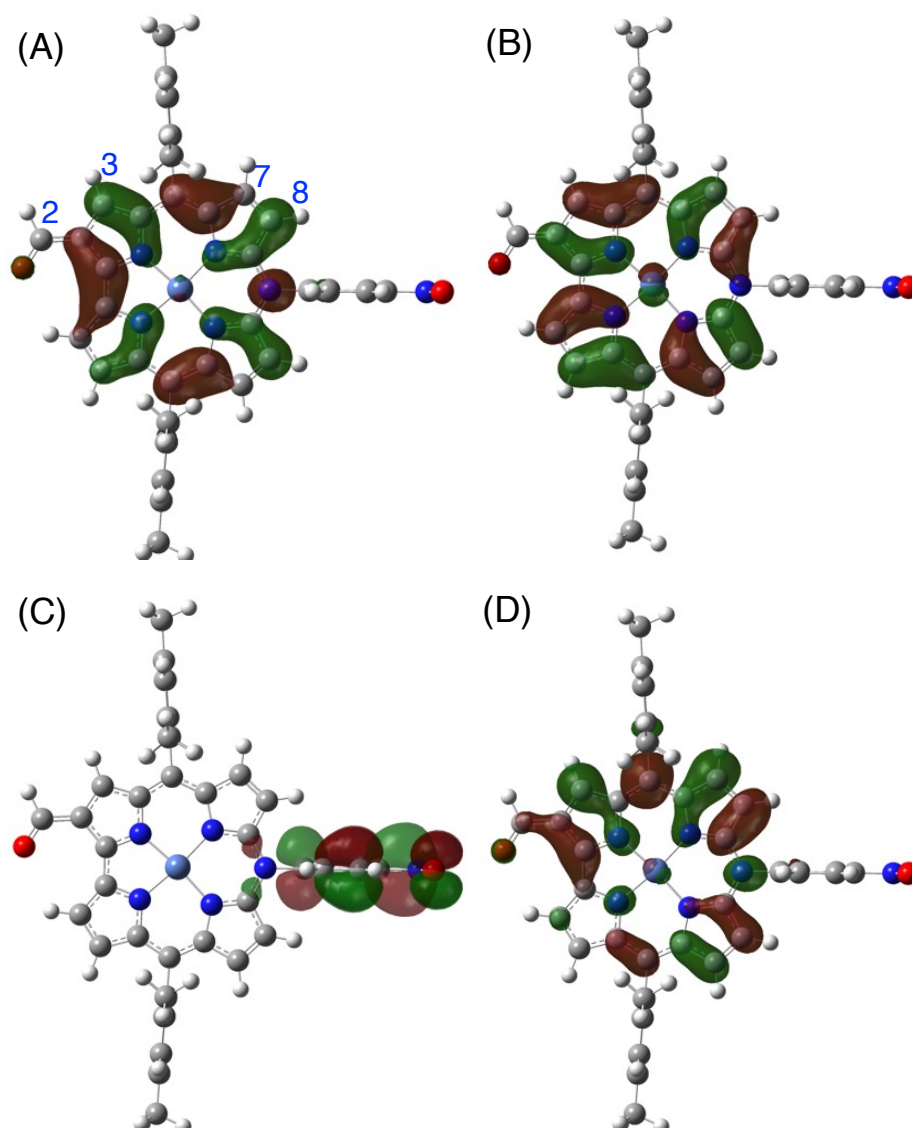

**Figure S62** (A) HOMO-1, (B) HOMO, (C) LUMO and (D) LUMO+1 of azacorrole **3** calculated at the B3LYP/6-31G(d)+SDD level.



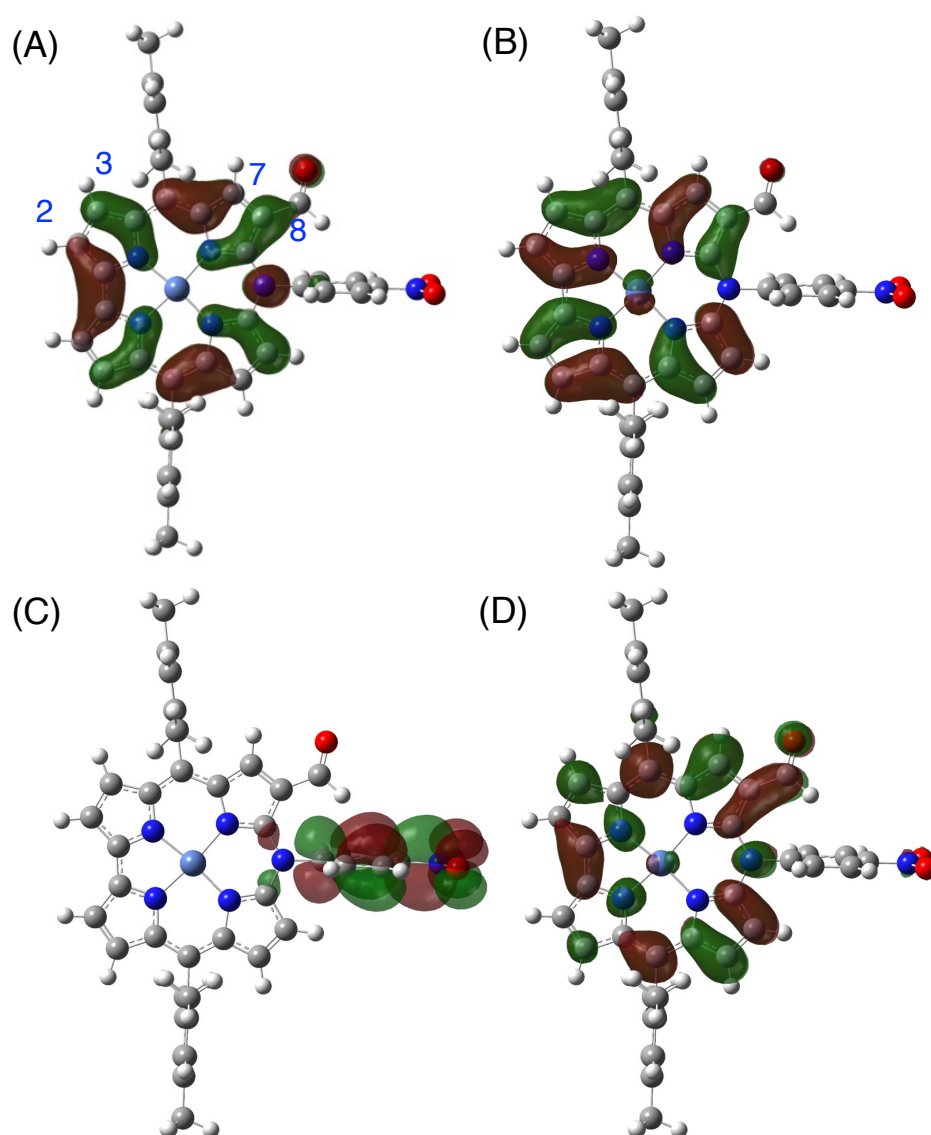

**Figure S63** (A) HOMO-1, (B) HOMO, (C) LUMO and (D) LUMO+1 of azacorrole **4** calculated at the B3LYP/6-31G(d)+SDD level.

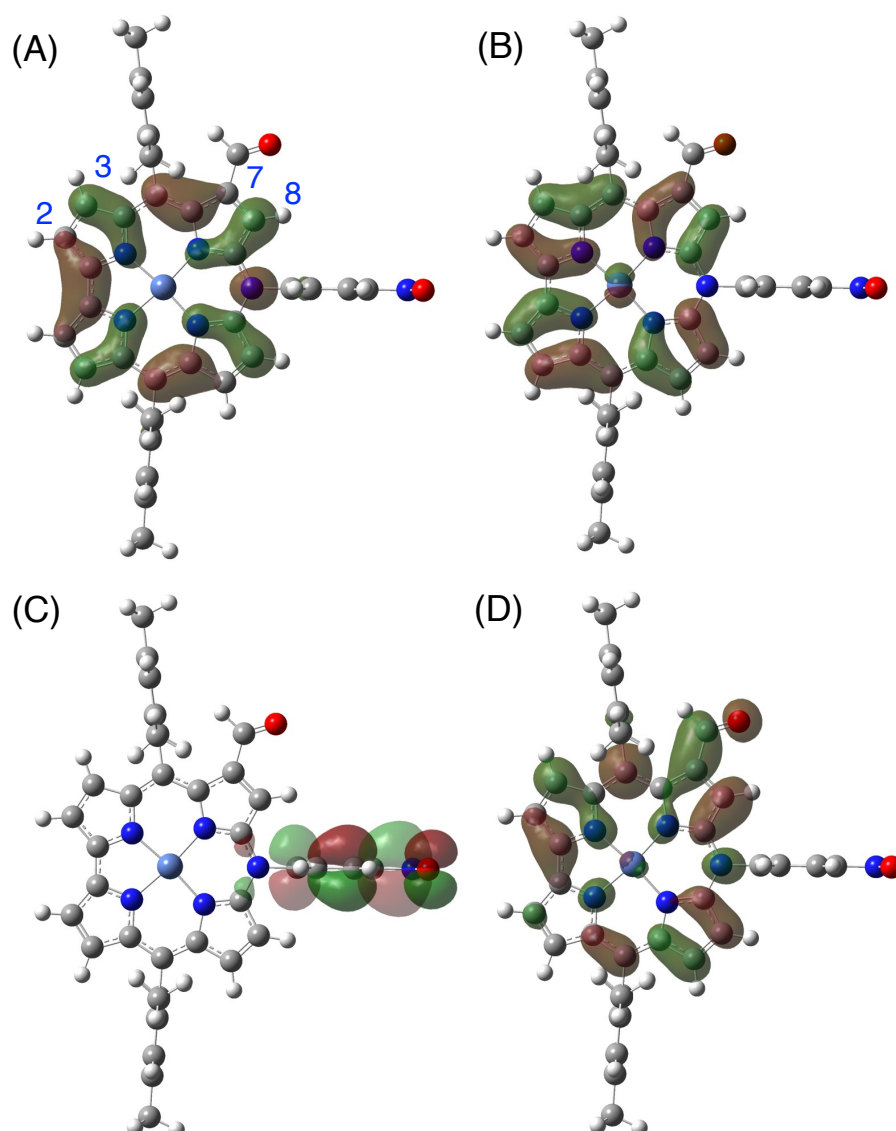

**Figure S64** (A) HOMO-1, (B) HOMO, (C) LUMO and (D) LUMO+1 of azacorrole 5 calculated at the B3LYP/6-31G(d)+SDD level.
